# Supplementary material for: Identification of TERRA locus unveils a telomere protection role through association to nearly all chromosomes
Source: PubMed Central journal article supplement — Nat Commun. 2014 Sep 3;5:4723. doi: 10.1038/ncomms5723 (PMC4164772; doi:10.1038/ncomms5723), 2014-09-03
Supplement: ncomms5723-s1.pdf [file ncomms5723-s1.pdf]

# Supplementary Figures

**A**

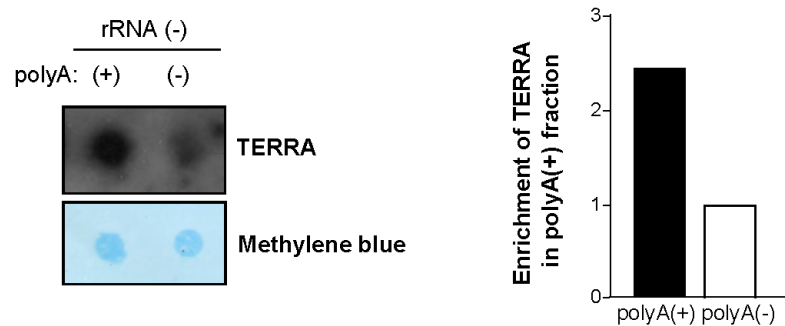

**B**

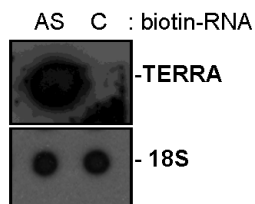

**C**

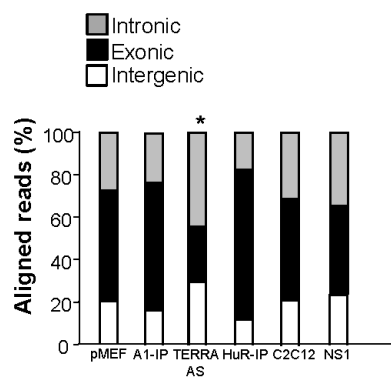

**D**

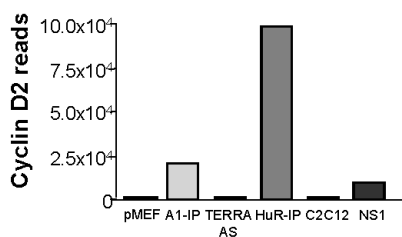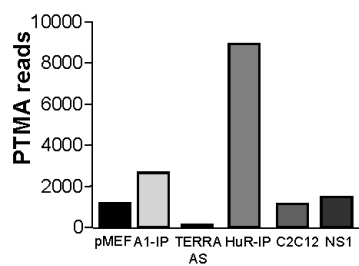

**E**

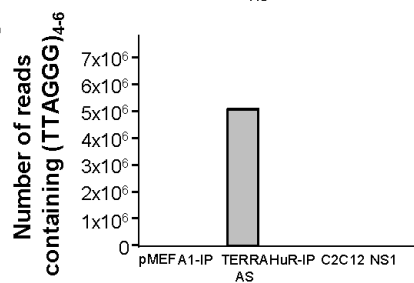

**Supplementary Figure 1. Quality check of reads and alignments upon RNA-seq.** (A) Total RNA was first depleted for rRNAs and then polyA (+) and polyA(-) fractions obtained. TERRA detection in these fractions was carried out by RNA dot blot using a  $^{32}\text{P}$ -dCTP labelled TERRA probe; Methylene blue was used as a loading control. (B) Biotin pull-down was carried out using nuclear protein lysates from pMEFs and an oligo complementary to the TERRA telomeric track (AS) as a bait, whereupon RNA was isolated and used for TERRA detection by RNA dot-blot. A biotinylated RNA corresponding to a random sequence of the same length as the biotinylated TERRA antisense oligo ( $\text{N}_{48}$ ) was used as control (C). (C) Percentage of aligned RNA-seq reads in intragenic (intronic+exonic) and intergenic regions within the different samples. \*  $(\text{TTAGGG})_{3-6}$  constitute 60% of the total number of reads in the the biotin pull-down sample (TERRA AS) and were not counted in this analysis (D) Number of reads aligned under the cyclin D2 and PTMA mRNAs within the different samples. (E) Total number of reads containing four-to-six TTAGGG repeats within the different samples.

**A**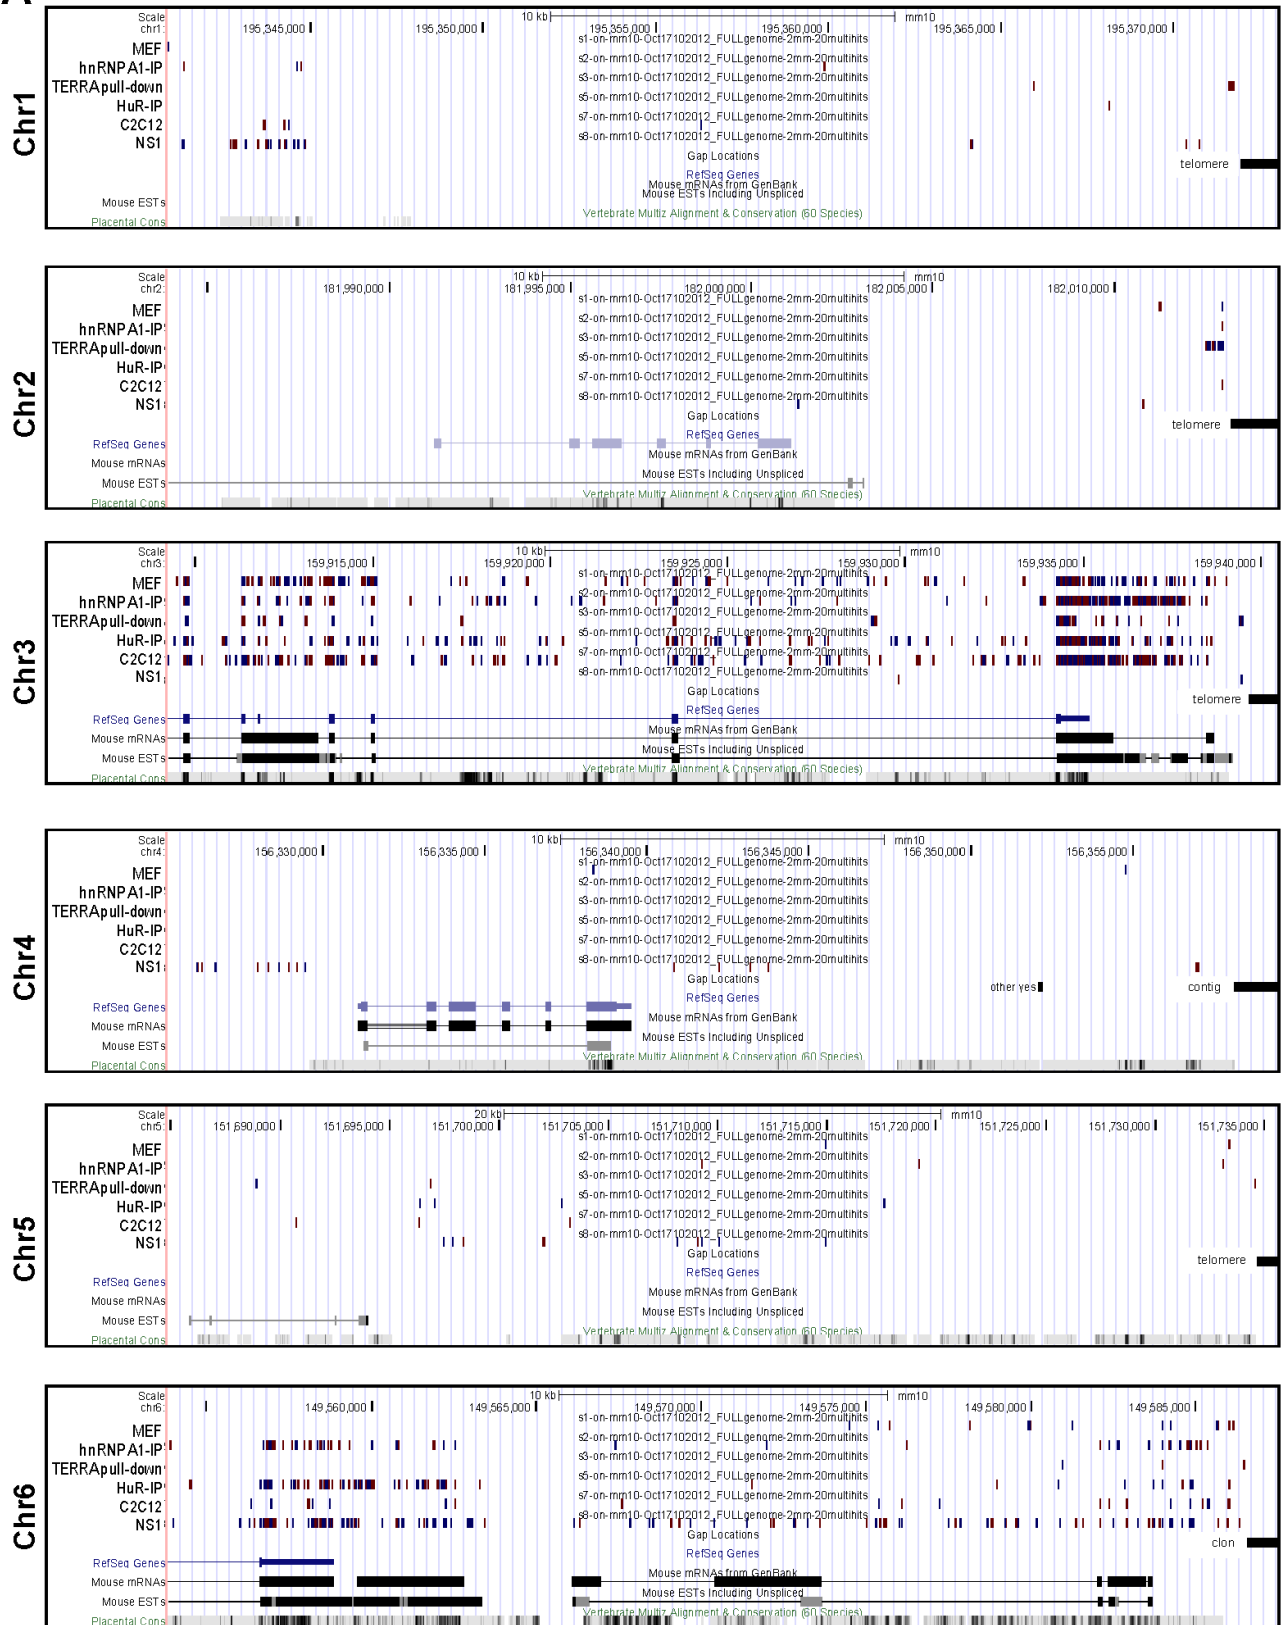**Lopez de Silanes\_Suppl. Fig. 2**

Chr7

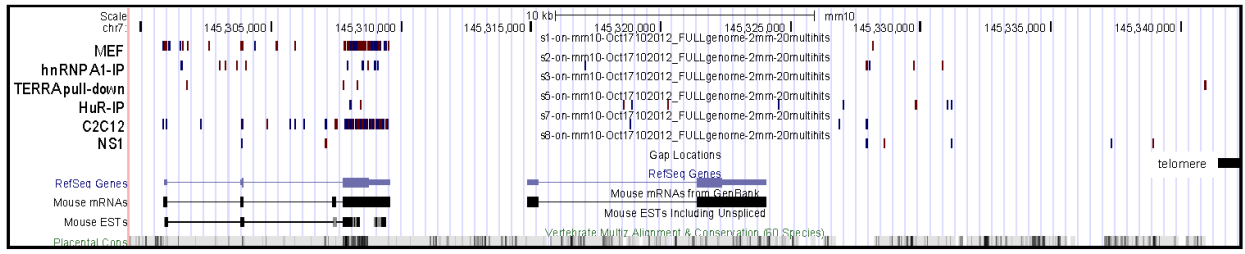

Chr8

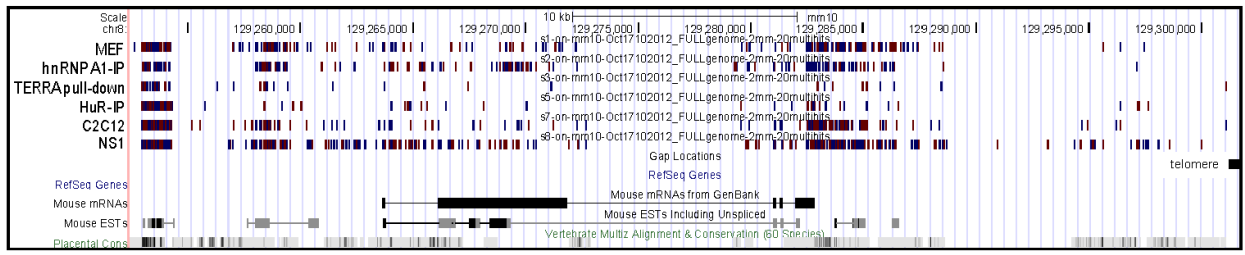

Chr9

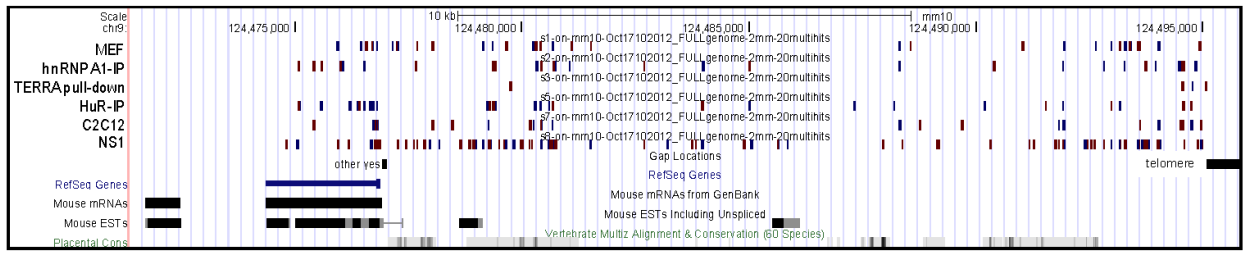

Chr10

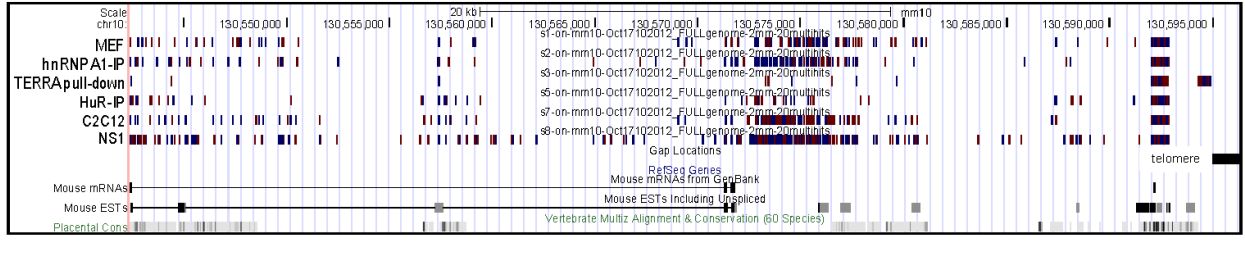

Chr11

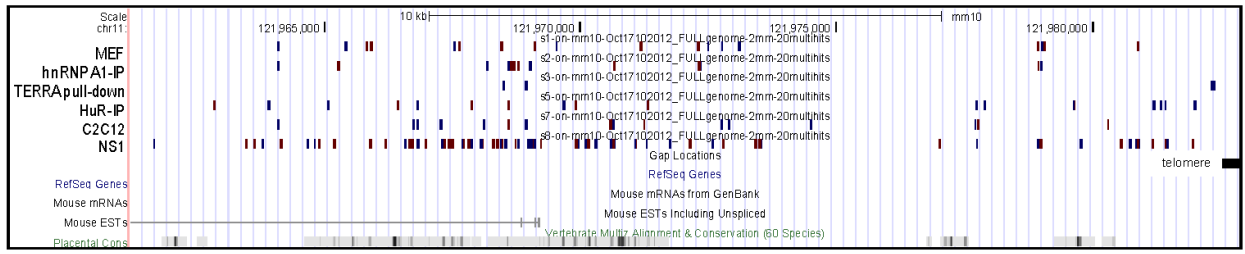

Chr12

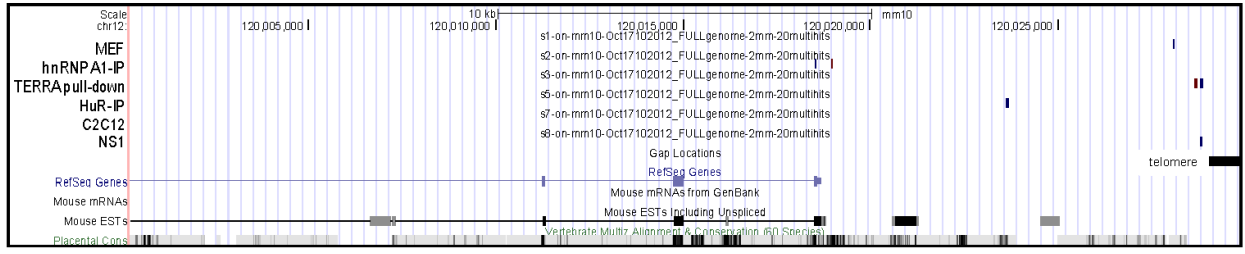

Lopez de Silanes\_Suppl. Fig. 2 (cont)

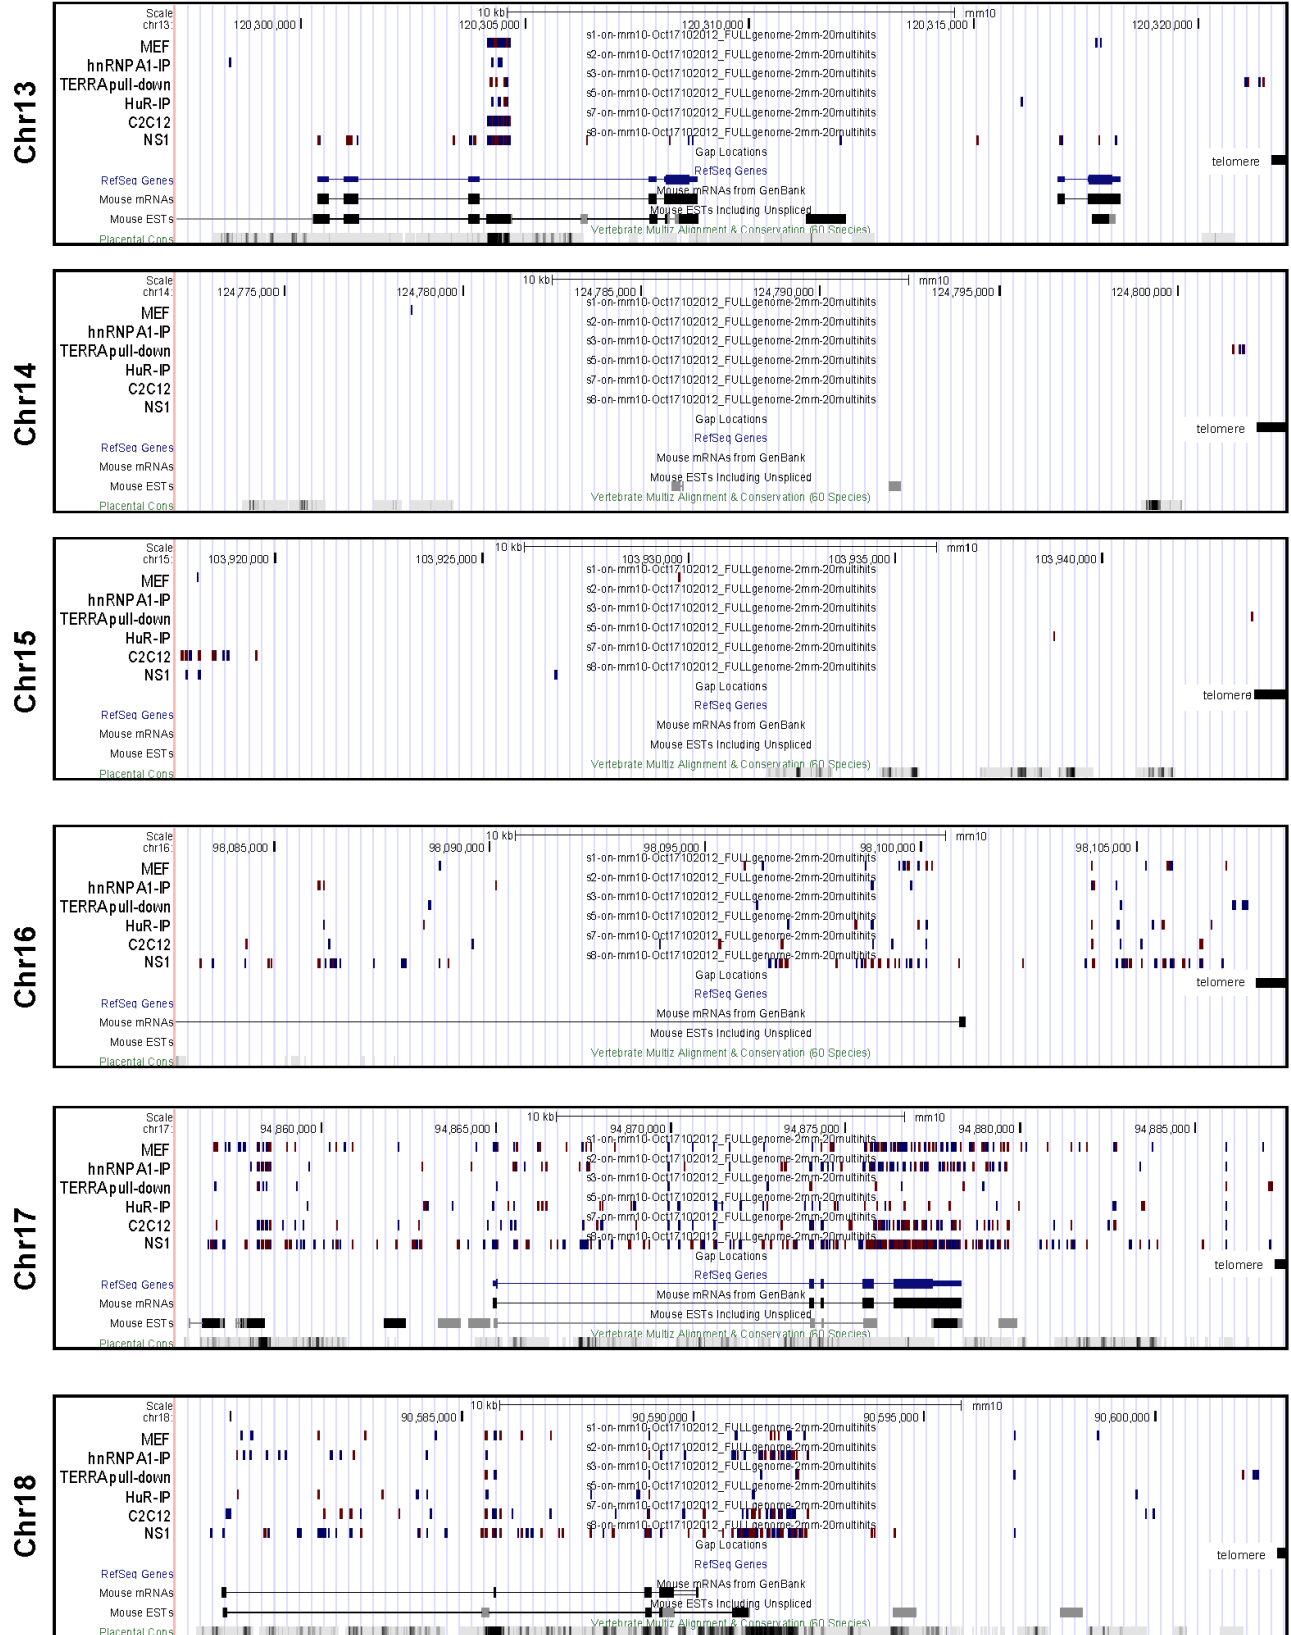

Lopez de Silanes\_Suppl. Fig. 2 (cont)

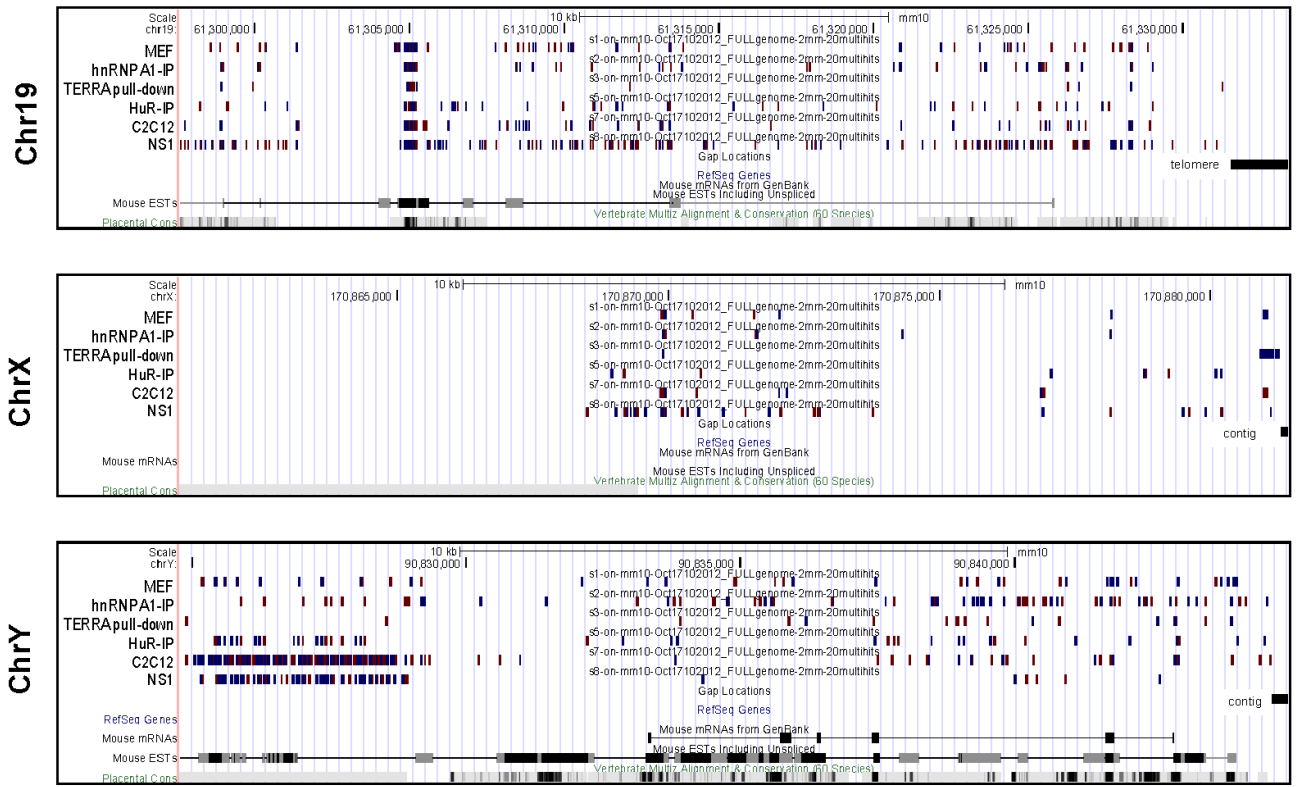

**B**

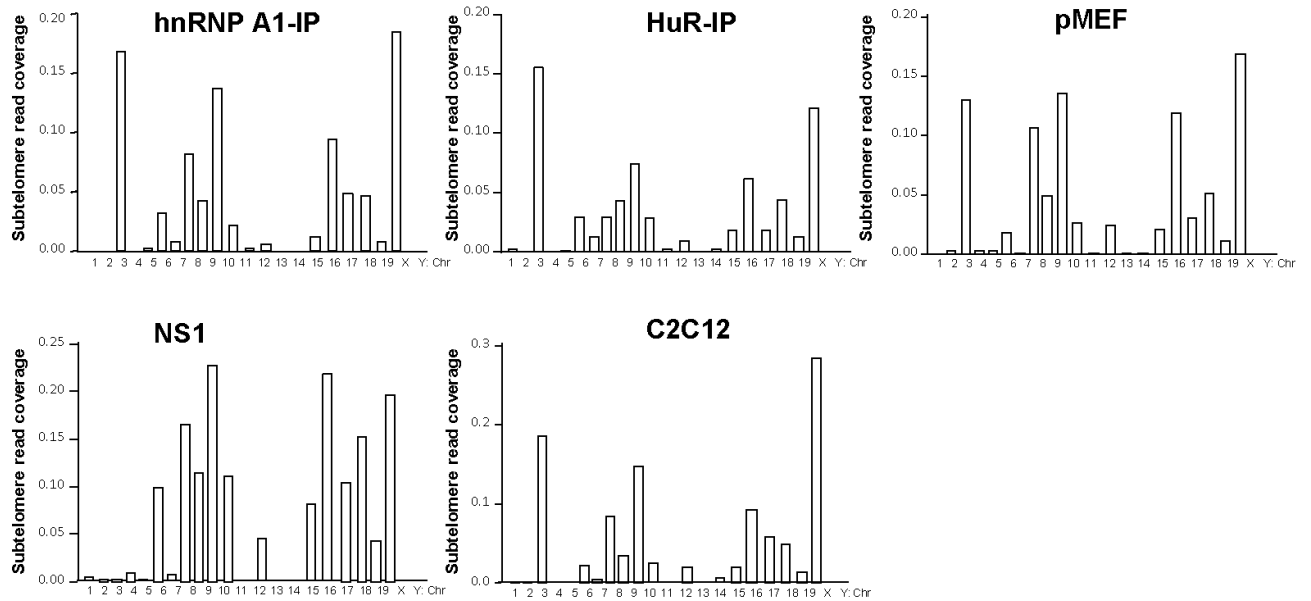

Lopez de Silanes\_Suppl. Fig. 2 (cont)

**Supplementary Figure 2. RNA-seq read alignments and read density at the subtelomeres of all chromosomes.** (A) UCSC snapshot showing (from top to bottom) the genomic scale, the RNA-seq read alignments for all the samples (S1-S8) within a 20-kb region just adjacent to the telomere of all chromosomes, annotated Ref Seqs, mRNAs and ESTs and mammal conservation. ‘Telomere’, ‘clone’ and ‘contig’ UCSC annotation can be seen as a solid bar on the right side of the snapshot. (B) Graphs show the read density corresponding to the samples that are not shown in Figure 1A in a 30-kb region adjacent to the telomere of each chromosome. Note that chromosome 4 and Y are not sequenced until the telomere.

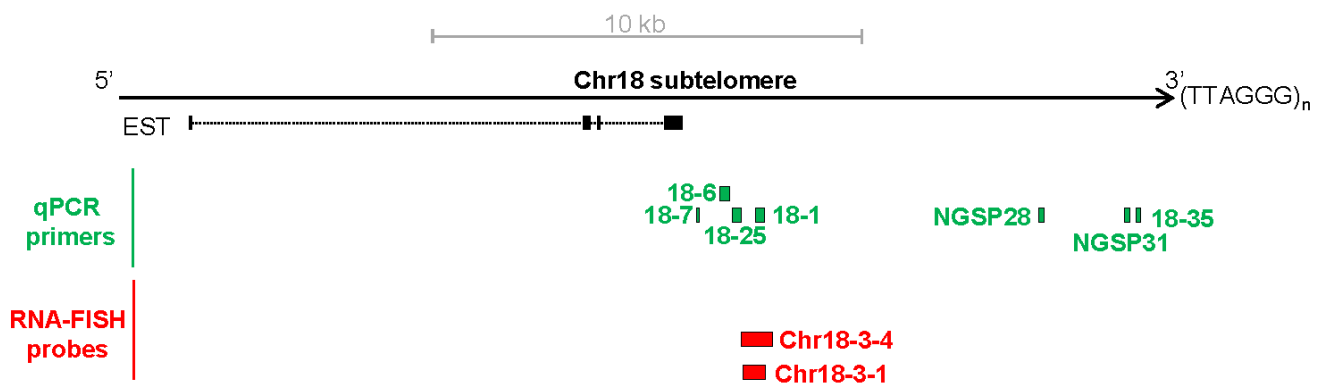

**Supplementary Figure 3. Genomic position of primers and RNA-FISH probes at the subtelomere of chromosome 18.** Diagram showing, from top to bottom, genomic scale, annotated EST and the position of qRT-PCR primers and RNA-FISH probes.



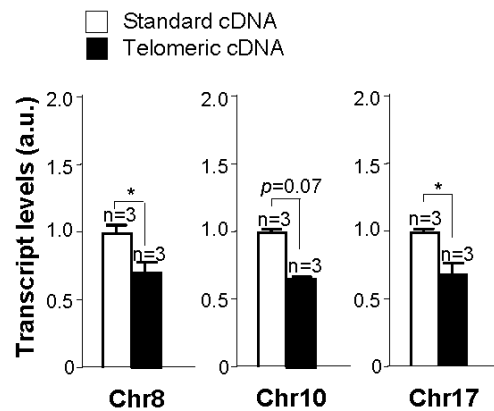

**Supplementary Figure 4. Chromosome 8, 10 and 17 are not enriched in the telomeric cDNA.**

Reverse-transcribed RNA prepared with either an oligo complementary to the telomeric repeat (4xCCCTAA) ('telomeric cDNA') or with random hexamers ('standard cDNA') was used for qPCR detection of chromosome 8, 10 and 17 transcripts. Data provided are the mean values  $\pm$ s.e.m from three different iPS clones. Statistical analysis carried out with The Student's *t*-test (\* $p < 0.05$  and \*\* $p < 0.001$ ).

**A**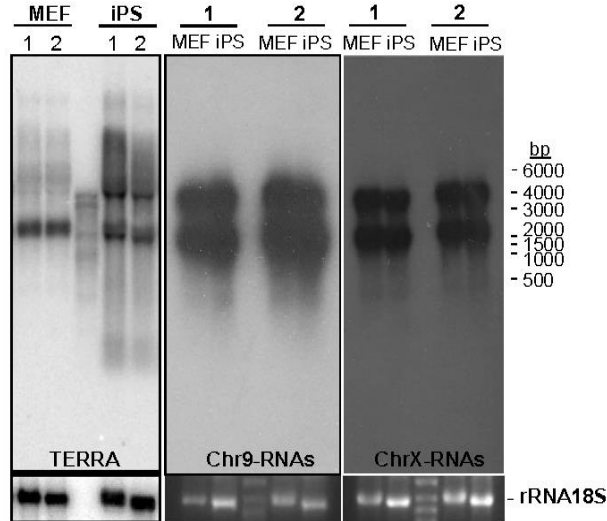**B**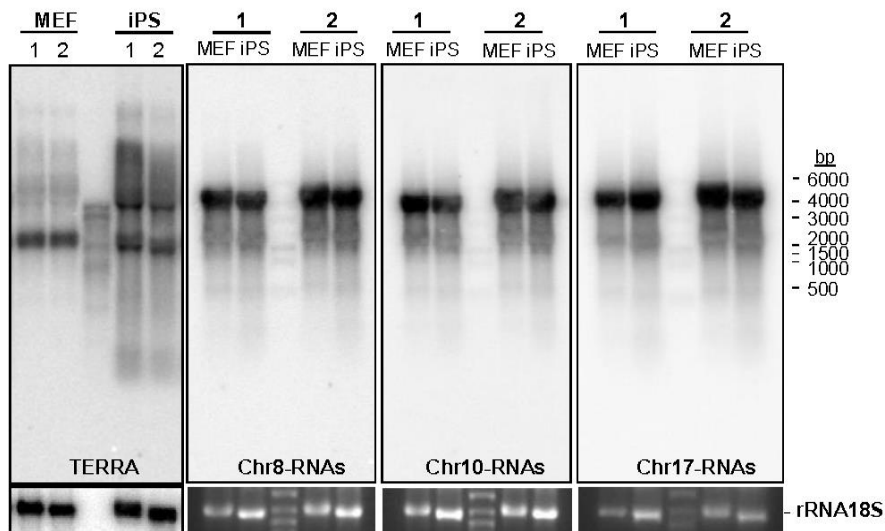

**Supplementary Figure 5. Transcripts arising from chromosome 9 and X render a size-restricted TERRA-like smear.** (A) Northern blotting using  $^{32}\text{P}$ -dCTP labelled probes targeting either TERRA or transcripts arising from the subtelomere of chromosome 9 and X or (B) from 8, 10 and 17 in two different clones of iPS and their parental pMEFs; rRNA 18S from ethidium bromide gel was included as a loading control. Note that the sample order in the TERRA Northern blot is different from the other ones but the samples loaded are the same for all Northern blots.

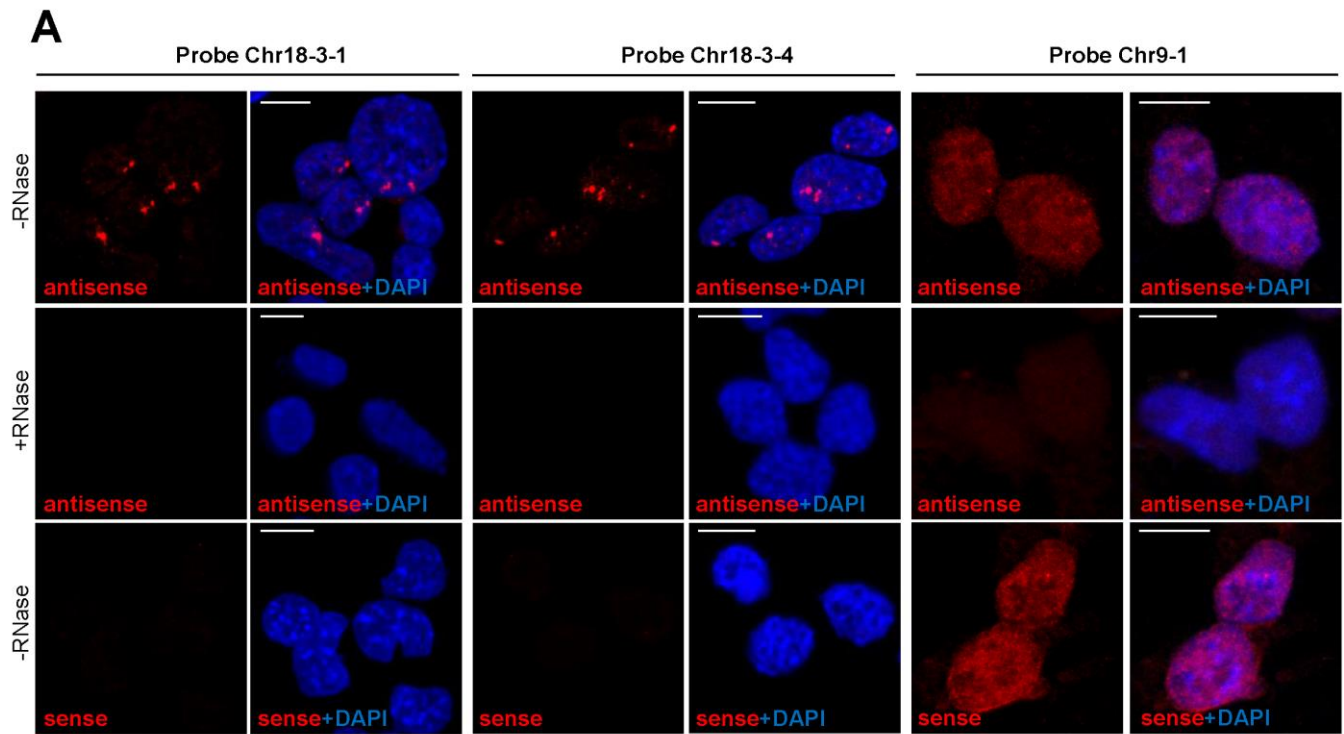

**B**

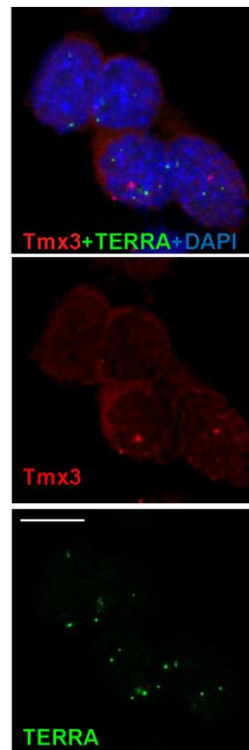

**C**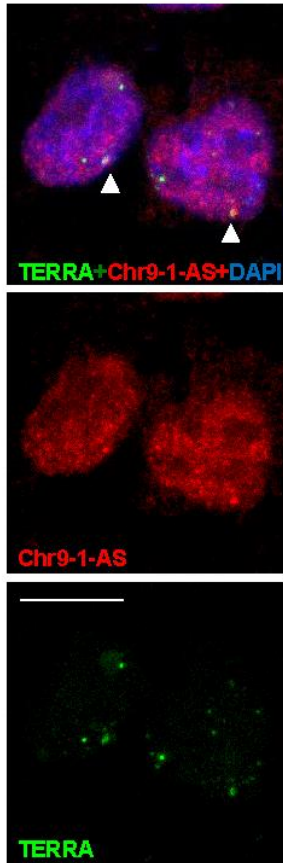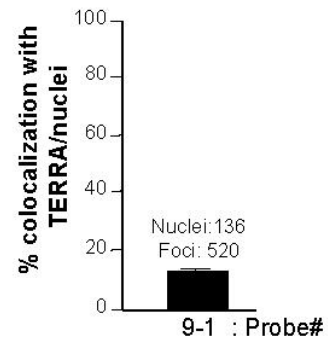**D**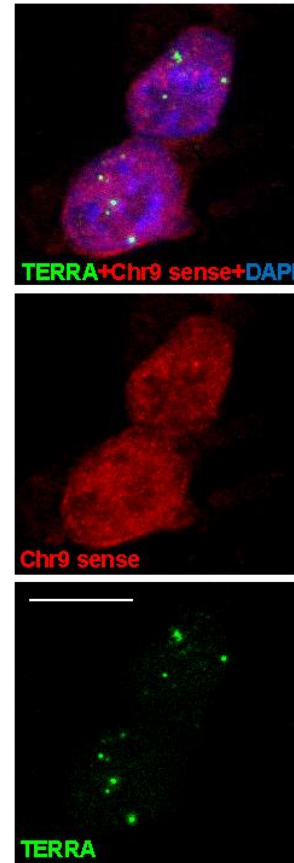**E**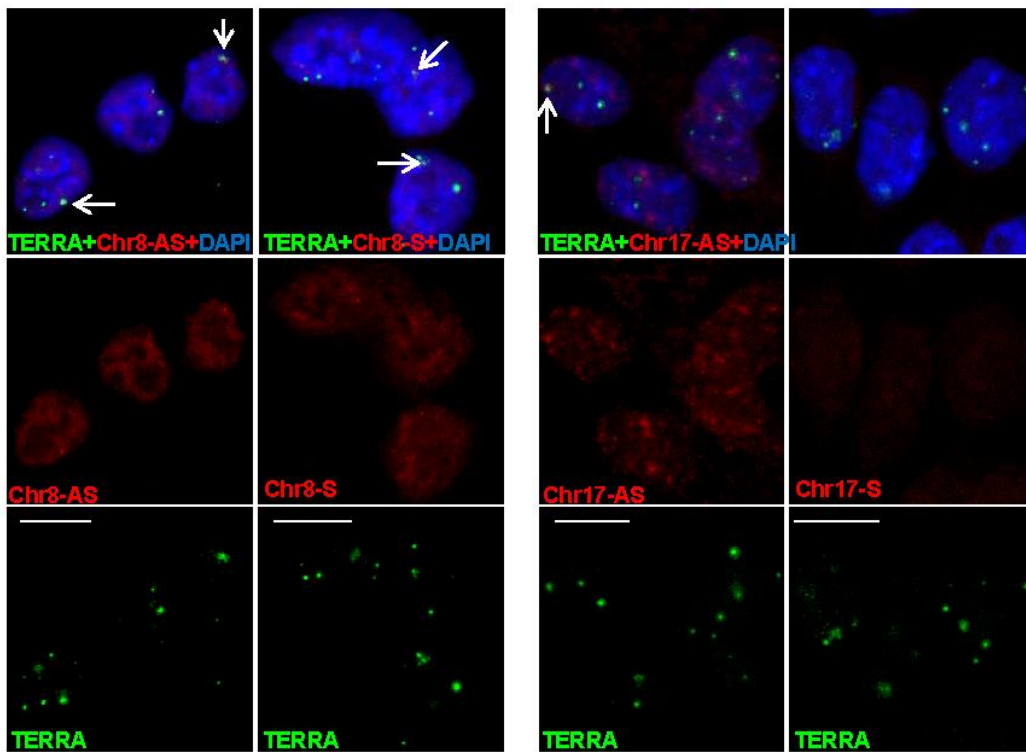

**Supplementary Figure 6. Specificity of RNA-FISH probes.** Confocal microscopy images from RNA-FISH preparations using **A)** the *antisense* and *sense* strands of the RNA-FISH probes in the absence or presence of RNase. **B)** Confocal microscopy images of double RNA-FISH preparations using probes targeting either TERRA (green) or Tmx3 (red). Tmx3 is the first gene annotated in the chromosome 18 subtelomere. **C)** Same as in B) but using a probe targeting chromosome 9-RNAs (red) or TERRA's telomeric track (green). The graph shows the percentage of colocalization of chromosome 9-RNAs with TERRA spots (mean+s.d, n=number of nuclei). Total number of foci and nuclei analyzed are indicated **D)** Same as in C) but using a probe against the negative strand of chromosome 9-RNAs (sense probe). **E)** Same as in C) but targeting chromosome 8 or 17 (red). Scale bars: 10  $\mu$ m

**A**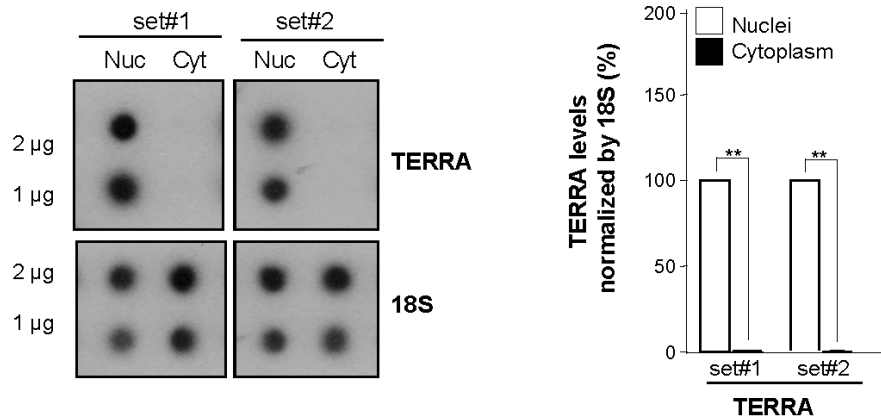**B**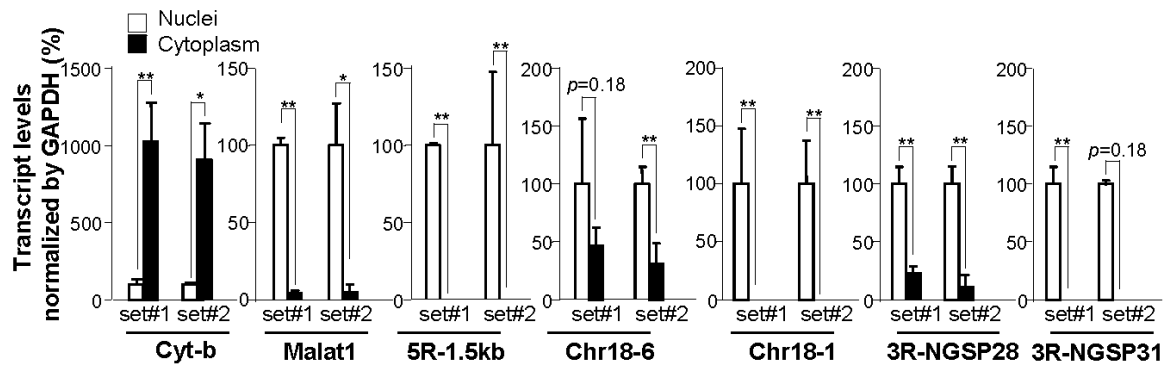

**Supplementary Figure 7. Chromosome 18-RNAs are enriched in the nuclear compartment.** RNA isolated from nuclear and cytoplasmic fractions from two independent set of pMEFs was used for (A) (Left) RNA dot-blot TERRA detection by RNA. Hybridization of 18S rRNA was included as a loading control. (Right) Quantification of TERRA signals normalized by 18S (mean+s.d, n=3 technical replicates in two independent set of pMEFs). (B) RT-qPCR detection of chromosome 18 transcripts in nuclear and cytoplasmic fractions (mean+s.d, n=3 technical replicates in two independent sets of pMEFs). Detection of *Malat1*, a known nuclear long-non coding RNA, and cytochrome b, a known cytoplasmic mRNA, serve to monitor the purity of the different fractions. Student's *t*-test was used for statistical analysis (\* $p < 0.05$  and \*\* $p < 0.001$ ).

**A**

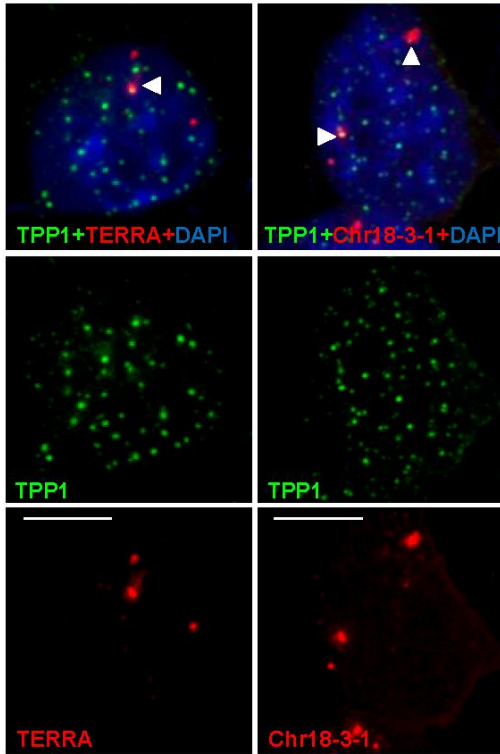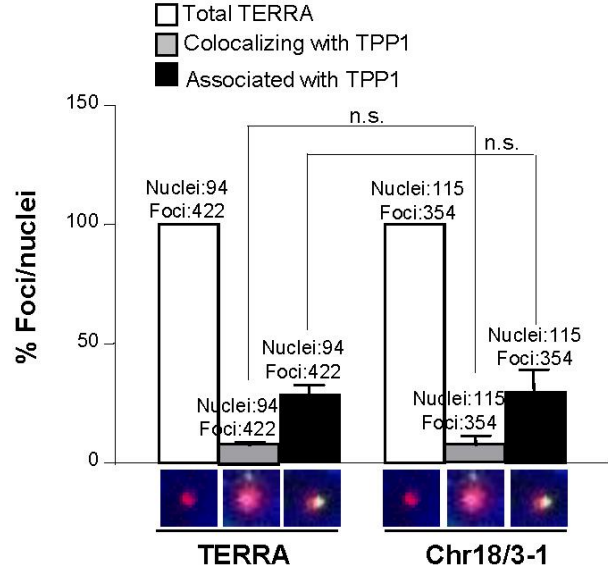

**B**

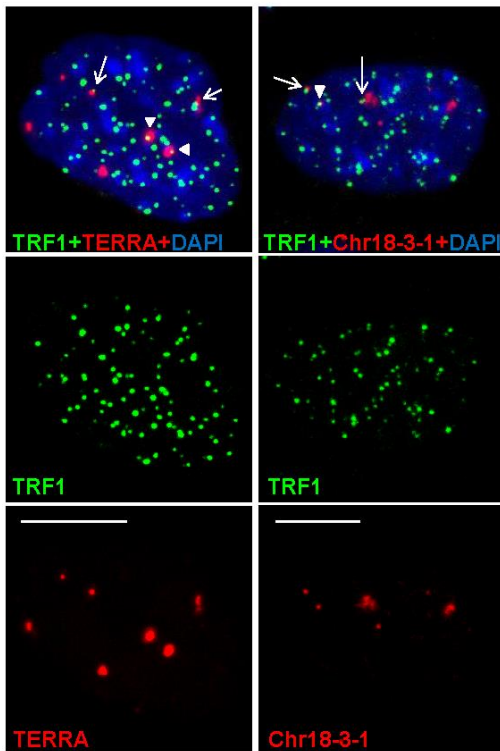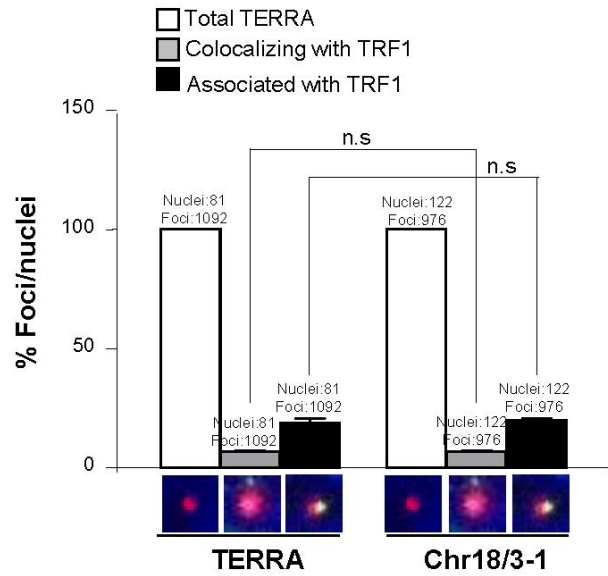

Lopez de Silanes\_Suppl. Fig. 8

**C**

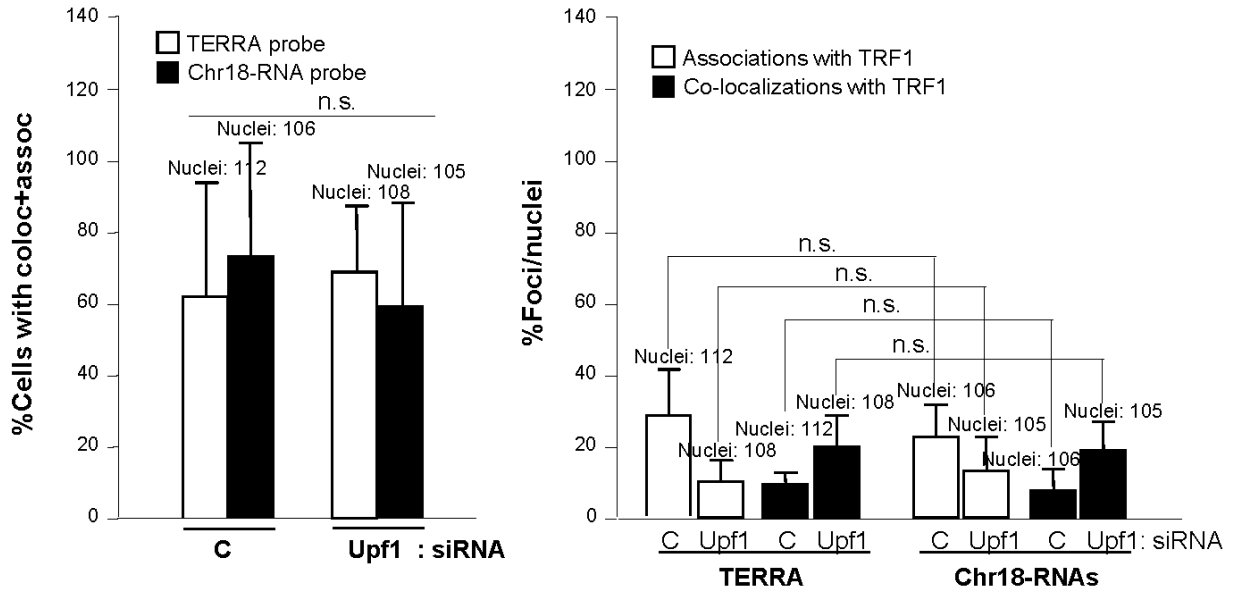

**D**

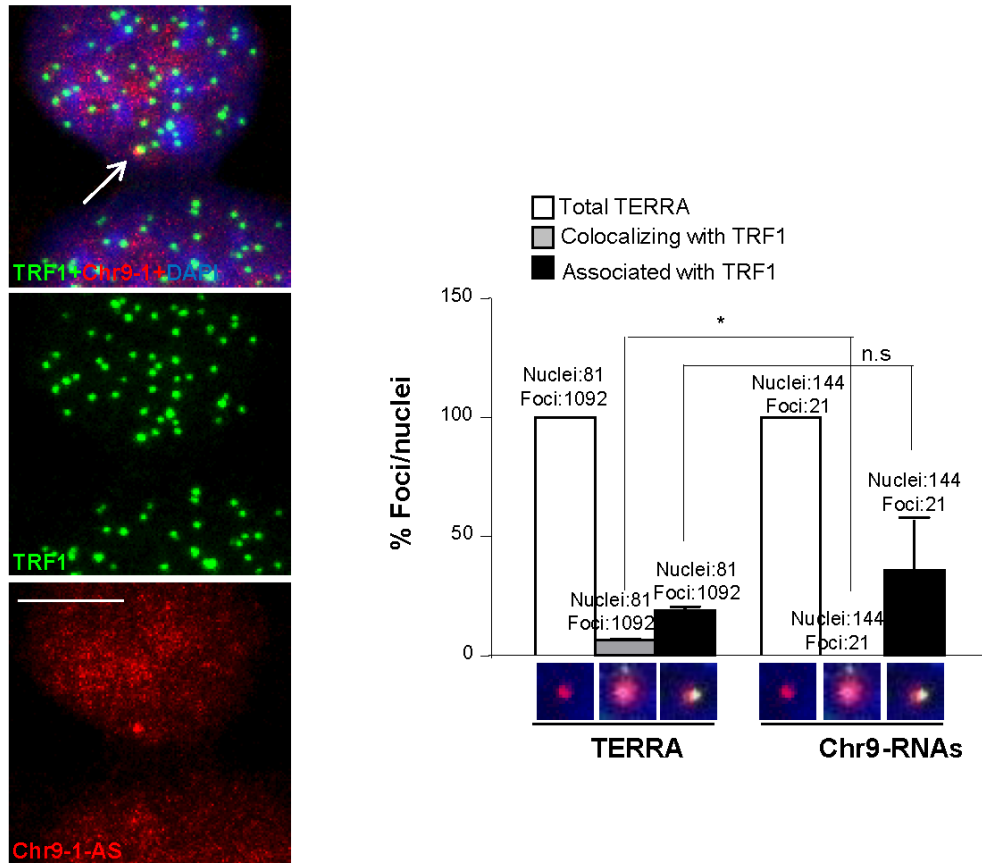

Lopez de Silanes\_Suppl. Fig. 8 (cont)



**Supplementary Figure 8. Chromosome 18- and 9-RNAs associate with telomeres as TERRA does.**

(A) Immunofluorescence followed by RNA-FISH to detect either TERRA or chromosome 18 transcripts foci (red) with either the telomere marker TPP1 protein or (B) TRF1 protein (green). Arrowheads and arrows indicate co-localization and association events, respectively. The percentages of either TPP1 or TRF1 foci co-localizing/associating with TERRA or Chromosome 18 RNAs per nuclei are represented (mean+s.e.m, n=number of nuclei; three different antibodies were used for telomere detection (TPP1, TRF1 and Rap1), see the results of Rap1 in **Fig. 2A**). C) Cells were transfected with either control siRNA or a siRNA against Upf1 and, two-days post-transfection, cells were processed for immunofluorescence to detect telomeres with a TRF1 antibody followed by RNA-FISH to detect either chromosome 18-RNAs or TERRA. (*Left*) The graph shows the percentage of cells with TRF1 colocalization/association with either Chromosome 18-RNAs or TERRA upon Upf1 downregulation (mean+s.e.m, n=number of nuclei). (*Right*) The percentages of TRF1 foci co-localizing/associating with TERRA or Chromosome 18-RNAs per nuclei upon Upf1 downregulation are also represented (mean+s.e.m, n=number of nuclei). (D) Same as in B) but using a probe against chromosome 9-RNAs (mean+s.e.m, n=number of nuclei). In all panels, the total number of foci and nuclei used for the analysis is indicated. Student's *t*-test was used for statistical analysis. Scale bars: 5  $\mu$ m

**A**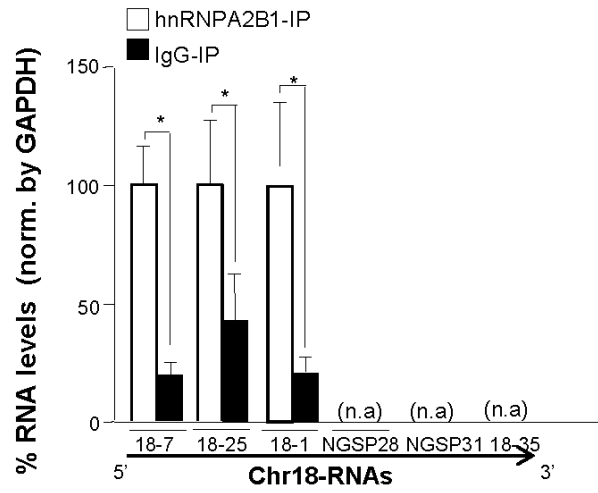**B**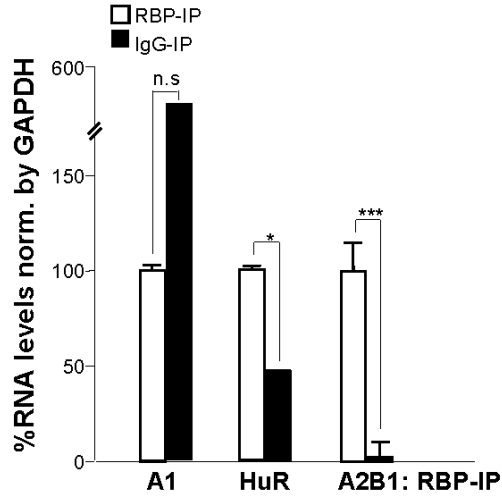**C**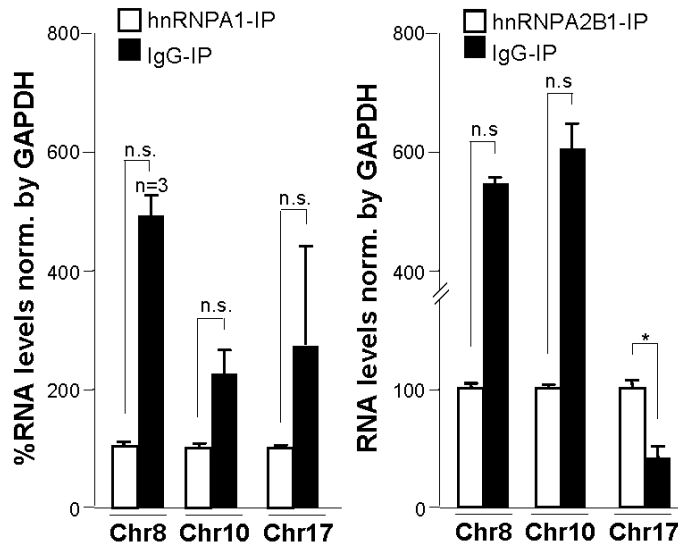

**Supplementary Figure 9. Binding of TERRA RNA-binding proteins to chromosome 18, 9, 8, 10 and 17-RNAs.** Immunoprecipitation (IP) assay of nuclear extracts prepared from iPS cells with antibodies recognizing the TERRA-bound RNA binding proteins under conditions that preserved mRNP complexes. RNAs isolated from IP material were subjected to qRT-PCR for (A) chromosome 18 (B) chromosome 9 and C) 8, 10 and 17 transcripts detection. The RNA-binding protein used is indicated in the different panels. GAPDH mRNA was used for normalization. Data was compared with respect an IgG-IP (mean values  $\pm$ s.e.m, in three different iPS clones). The Statistical analysis performed with the Student's *t*-test from three independent experiments ( $*p < 0.05$ ,  $**p < 0.001$  and  $***p < 0.0001$ ).

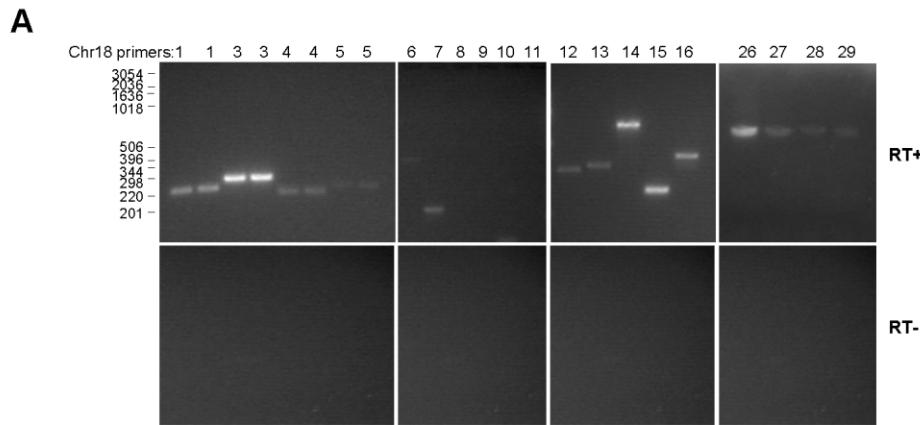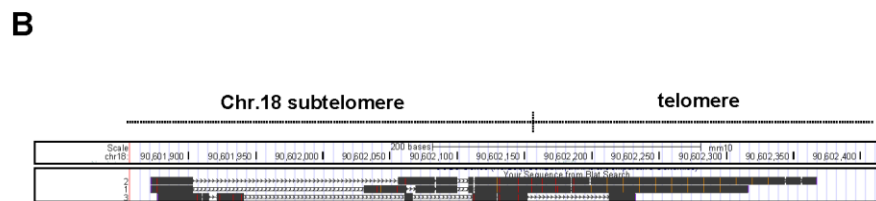

**C**

>NGSP30sin31\_3clon31

GGGTCAAGGTCAGGGTTAGGGTTGTTGGGTCAAGGTCAGGGTTAGGGTCAAGGTCAGGG  
 TTAGGGTCAAGGTCAGGGTTAGGGTCAAGGTCAGGGTTAGGGTCAAGGTCAGGGTTAGG  
 GTCAAGGTCAGGGTTAGGGTCAAGGTCAGGGTTAGGGTCAAGGTCAGGGTTAGGGTCAA  
 GGTCAGGGTTAGGGTCAAGGTCAGGGTTAGGGTCAAGGTCAGGGTTAGGGTCAAGGTC  
 GGGTTAGGGTCAAGGTCAGGGTTAGGGTCAAGGTCAGGGTTAGGGTCAAGGTCAGGGTT  
 AGGGTCAAGGTCAGGGTTAGGGTCAAGGTCAGGGTTAGGGTCAAGGTCAGGGTTAGGGT  
 CAAGGTCAGGGTTAGGGTCAAGGTCAGGGTTAGGGTCAAGGTCAGGGTTGGGGTCAAGG  
 TCAGGGTTAGGGTTGTTGGGTCAAGGTCAGGGTTAGGGTTGTTGGGTCAAGGTCAGGGTT  
 AGGGTTGTTGGGTCAAGGTCAGGGTTAGGGTTGTTGGGTCAAGGTCAGGGTTAGGGTTGT  
 TGGGTCAAGGTCAGGGTTAGGGTTGTTGGGTCAAGGTCAGGGTTAGGGTTGTTGGGTCAA  
 GGTCAGGGTTAGGGTTGTTGGGTCAAGGTCAGGGTTAGGGTTGTTGGGTCAAGGTCAGG  
 GTAGGGTTAGGGTTAGGACTCTGCGTTGATACCACT

**Supplementary Figure 10. Sequence alignment of 3'RACE TTAGGG-containing clones at the subtelomere of chromosome 18 (A)** Upon DNase treatment, reverse-transcribed RNA from pMEFs was used for PCR detection of transcription arising from different genomic position at the subtelomere of chromosome 18. RT(-) reactions (RT performed in the absence of reverse transcriptase) is shown to exclude possible amplifications due to genomic DNA contamination. **B)** USCS snapshot showing, from top to bottom, start of the telomere (contiguous TTAGGG repeats), genomic scale, genomic position and aligned 3'RACE clones that contain TTAGGG repeats. Red lines indicate mismatches. **C)** The sequence of one of the clones obtained upon 3'RACE is shown. TTAGGG repeats are highlighted in red.

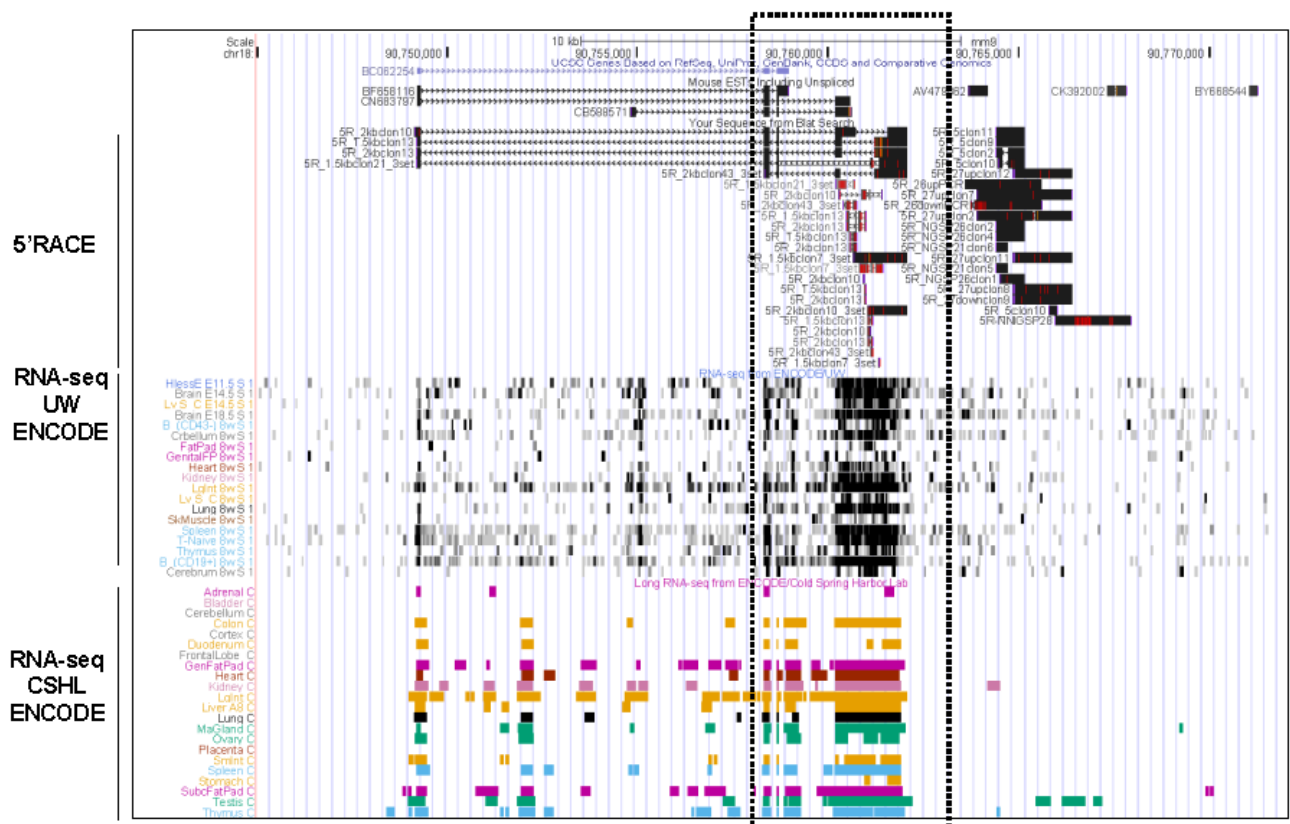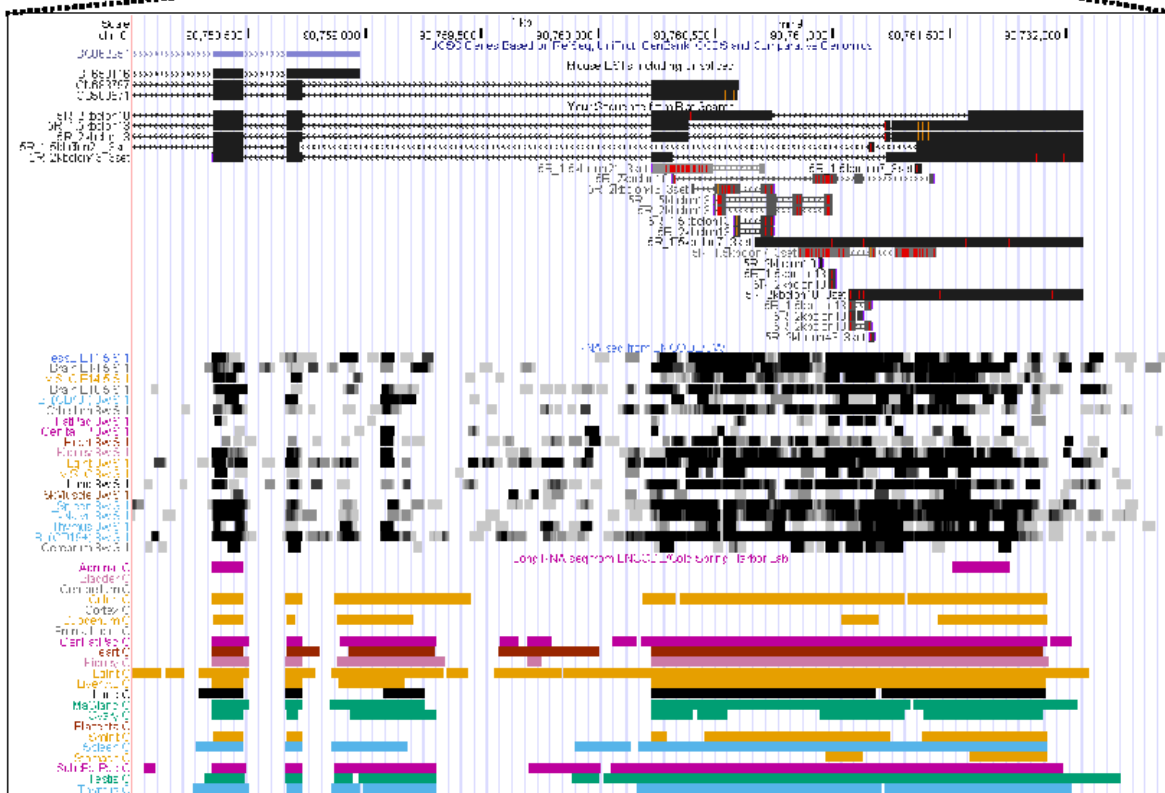

Lopez de Silanes\_Suppl. Fig. 11

**Supplementary Figure 11. Sequence of RACE clones overlap with external RNA-seq data at the subtelomere of chromosome 18.** UCSC snapshot comparing the genomic position of the RACE products and the external RNA-seq data from UW and CSHL both from the ENCODE Project. Zoom region is shown for snapshot details.

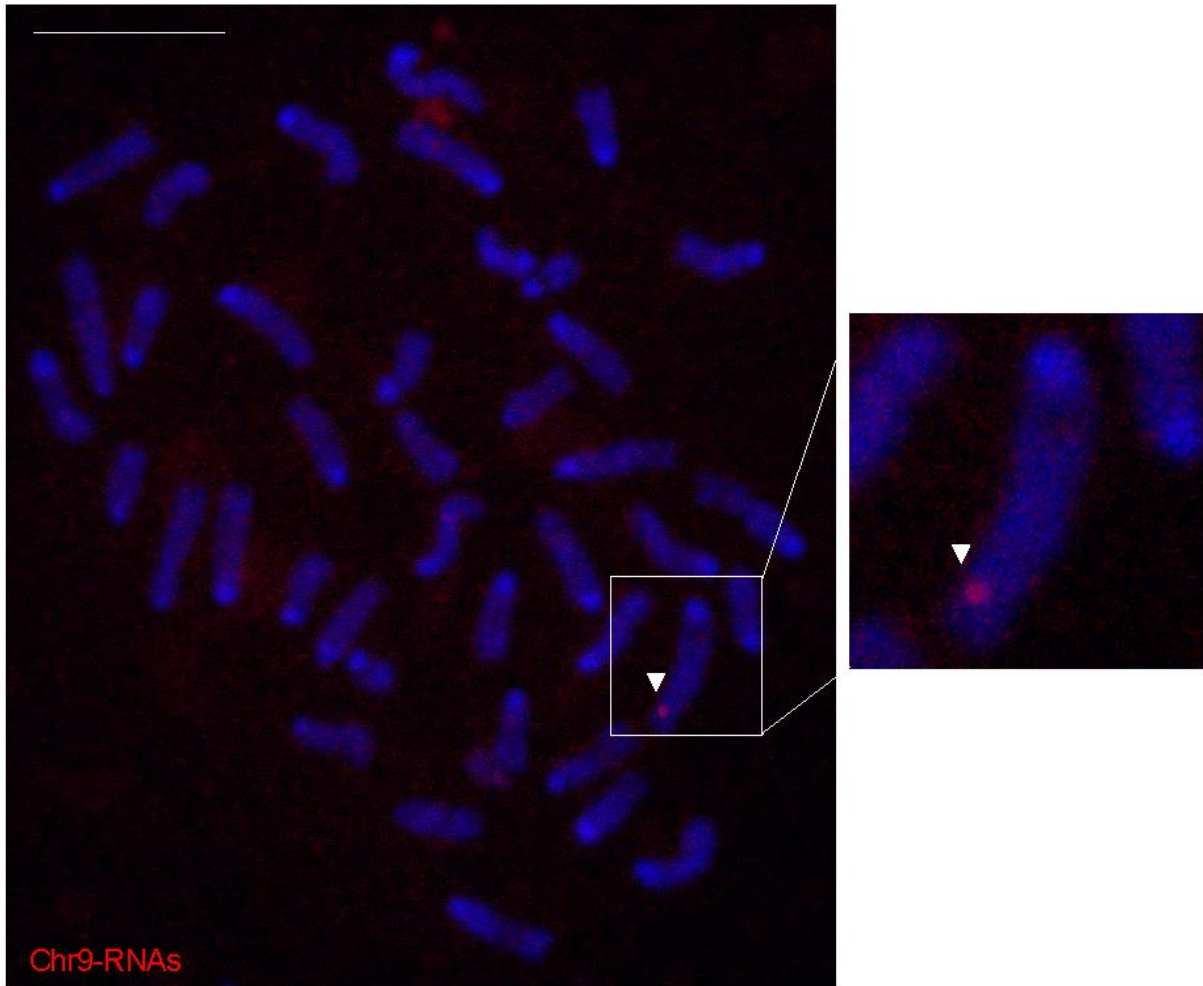

**Supplementary Figure 12. Chromosome 9-RNAs associate with chromosome-end in metaphase**  
RNA-FISH on metaphases spreads using probes targeting chromosome 9-RNAs. Zoom of these associations is shown. Associations are labelled with arrowheads. Scale bars: 10  $\mu$ m

**A**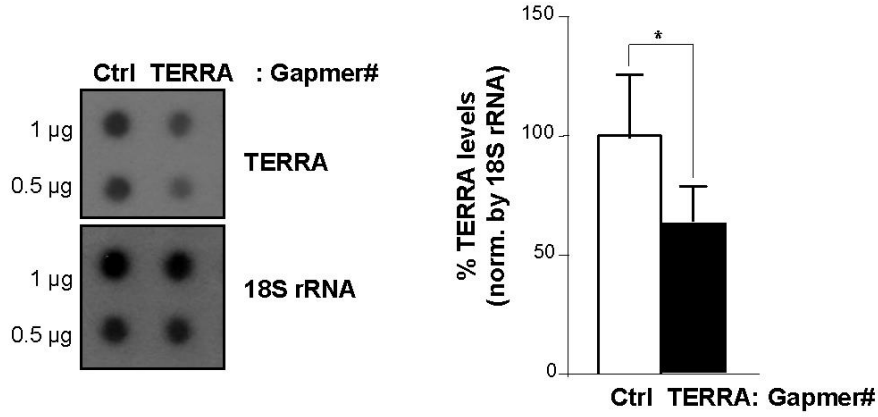**B**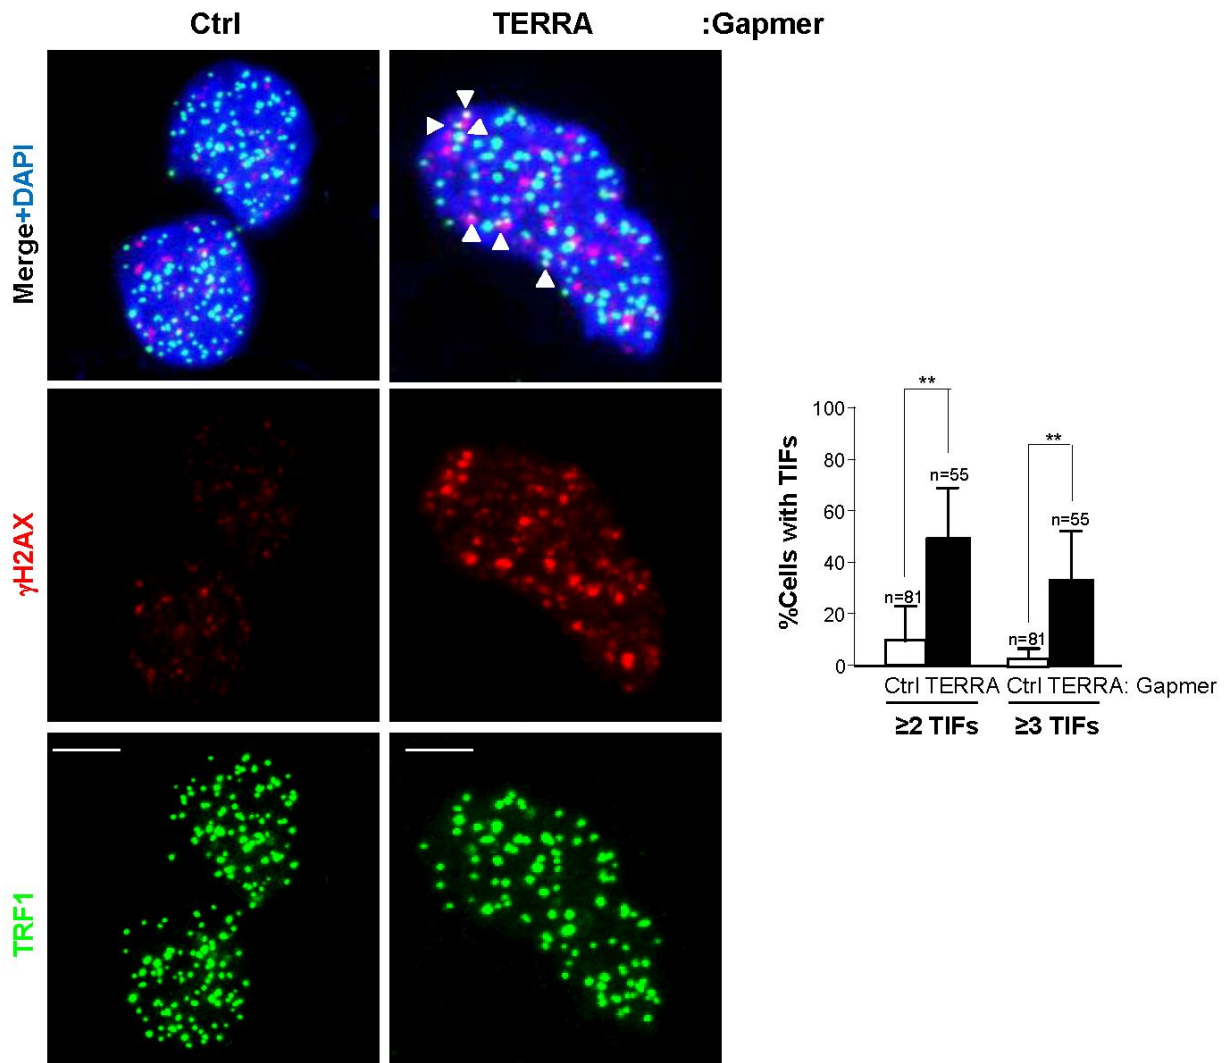



**Supplementary Figure 13. Downregulation of TERRA by targeting the telomeric track induce telomere damage.** (A) Cells were transfected with control Gapmer (Ctrl) or with Gapmer against the telomere track (TERRA). TERRA levels were assessed 48-hrs post-transfection by RNA dot-blot using a  $^{32}\text{P}$ -dCTP labeled probe; hybridization of 18S rRNA was included as loading control (Right) Quantification of the RNA dot-blot signals normalized by rRNA 18S (mean values +s.e.m.; three independent transfections). (B) Representative images of TRF1 (green) and  $\gamma\text{H2AX}$  (red) fluorescence and of the merged images. Co-localization events (arrowheads) indicate telomere dysfunction-induced foci (TIF). (Graph) Percentage of cells with  $\geq 2$  or  $\geq 3$  TIFs/nuclei (mean values +s.d. ; three independent transfections). Student's *t*-test was used for statistical analysis ( $*p < 0.05$  and  $**p < 0.001$ ). Scale bars: 5  $\mu\text{m}$

**A**

**Chr.18 vs Chr.6**

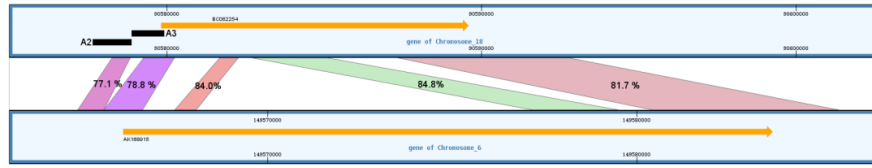

**Chr.18 vs Chr.8**

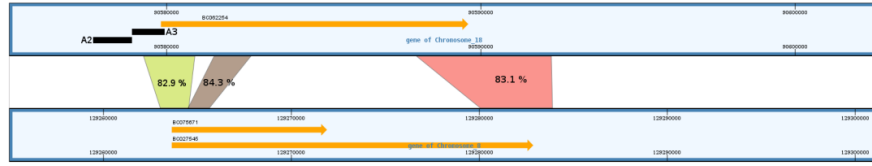

**Chr.18 vs Chr.17**

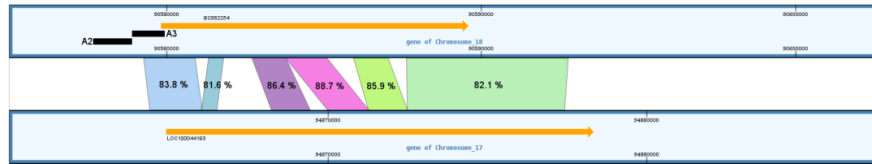

**B**

| Chr.# | Start     | End       | Lenght (bp) | % identity | Distance to telomere |
|-------|-----------|-----------|-------------|------------|----------------------|
| 18    | 90578850  | 90579850  | 1000        | 100        | 22,790 bp            |
| 6     | 149564692 | 149566151 | 1459        | 47.2       | 20,396 bp            |
| 8     | 129262122 | 129263681 | 1559        | 47.6       | 37,533 bp            |
| 17    | 94863660  | 94864969  | 1310        | 48.4       | 22,303 bp            |

**C**

**Chr. 8**

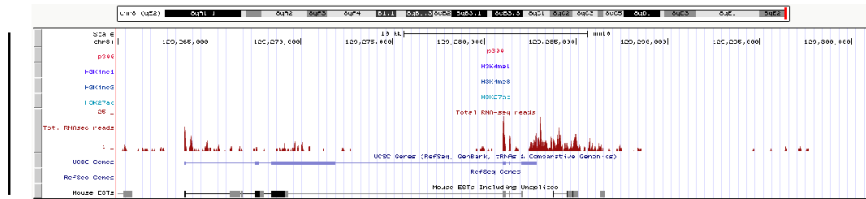

**Chr. 10**

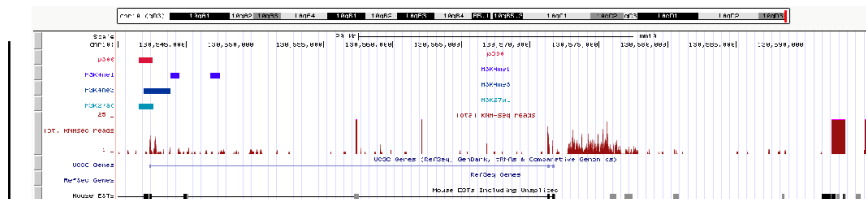

**Chr. 17**

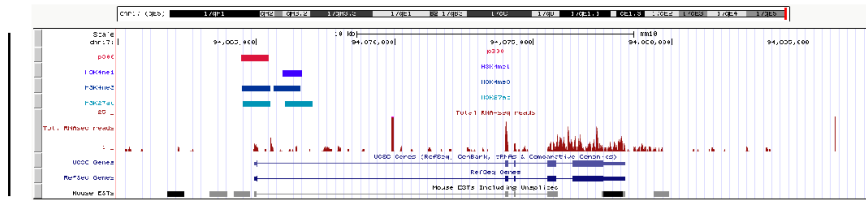

**Chr. 18**

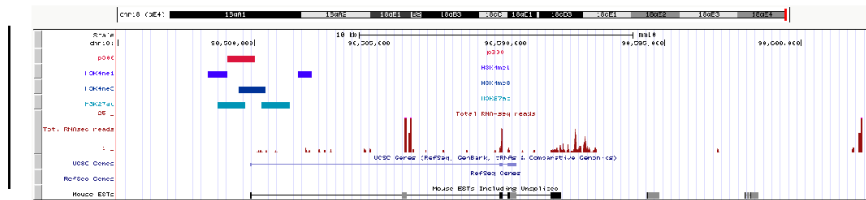

**Supplementary Figure 14. Comparison of chromosome 18 subtelomere with the subtelomeres of all chromosomes.** (A) Synteny blocks between chromosome 18 subtelomere with either chromosome 6, 8 or 17 subtelomeres is depicted. The percentage of synteny conservation is depicted in each block is shown. The chromosome 18 subtelomere region spans from the identified promoter region A2-A3 (black rectangles) to the telomere. In orange can be seen the annotated EST that overlaps with the RACE products. (B) Table showing the location, percentage of identity and distance to the telomere of A3 region from chromosome 18 and A3-like regions in chromosomes 6, 8 and 17. (C) UCSC snapshot showing, from top to bottom, chromosome ideogram indicating the position of the snapshot (red bar), ChIP data for p300 (red bar), H3K4me1 (violet bar), H3K3me3 (blue bar) and H3K27ac (light blue bar), aggregated RNA-seq reads, UCSC genes, Ref seq and annotated mouse ESTs.

## Supplementary Notes

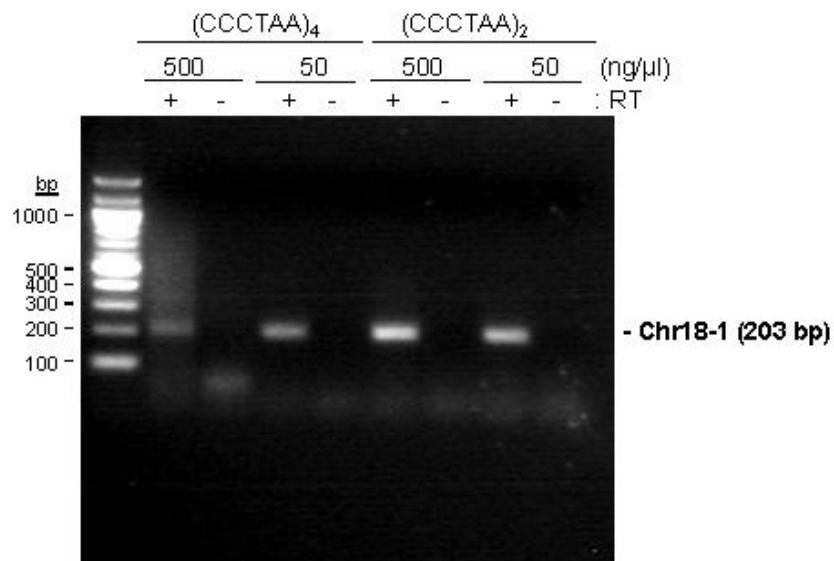

**Supplementary Note 1: Raw image from Main Figure 2A.** Reverse-transcribed RNA prepared with two different oligos complementary to the telomeric repeat (CCCTAA)<sub>4</sub> or (CCCTAA)<sub>2</sub> were used for PCR detection of chromosome 18 transcripts using primer Chr18-1. Two different concentrations of oligos were used. RT(-) reactions (performed in the absence of reverse transcriptase) are shown to exclude possible amplifications due to genomic DNA contamination. Markers and expected size for amplicon using primer hr18-1 is shown.

## **Supplementary Methods**

### **Synteny analysis**

The full mouse chromosome 18 was aligned with the rest of the mouse chromosomes in a pairwise manner with Lastz, an improved version of Blastz (Schwartz et al., 2003; Harris et al., 2007). From these alignments, syteny blocks were extracted and visualized with mGSV (Revanna et al., 2011) for the subtelomeric regions.

### **Identification of promoter A2 and A3-like regions in the subtelomeres of other chromosomes**

Local alignments of the promoter A2 and A3 region from chromosome 18 was performed against the subtelomeres of chromosomes 6, 8 and 17 with the EMBOSS implementation of the Smith-Waterman algorithm (Smith et al., 1981; Rice et al., 2000).

### **Gapmer**

Ctrl-Gapmer: GCGACGTAAACGGCCACAAG

Chromosome 18-Gapmer1: ATTTGGAGACTAGTG

TERRA-Gapmer: TAACCCTAACCCCTAACCCCTA

### **Northern blot probes**

L-NB-chr18\_1 GGGGGTTAGGGGTAAGGTTT

R-NB-chr18\_1 AGGAATCACTGCTGGCATT

L-NB-Chr8 CCATAAAGGCCTTCTCAAGC

R-NB-Chr8 CAGAGTTCATTACCTGCTCA

L-NB-Chr10/17GGGAAATTGCTAAGCTGATGA

R-NB-Chr10 CAGATCCCATGTTCTGATGC

R-NB-Chr17 GTTCATTACCTGCGCATCAG  
L-Chr9-NB1 GCATGCTCATTGAAGACC  
R-Chr9-NB1 ACCAAGAGGGACTAGAGCTT  
L-ChrX-NB1 GTGAAGGATTCAGCAAAGC  
R-ChrX-NB1 GAACTGGAGTGAATGTGTCA

## **RNA-FISH**

L-chr18\_3\_T7 ccaagcttctaatac gactcactatagg gagaCGCTGAAGAGAAACCCTGTG  
R-chr18\_1\_T7 ccaagcttctaatac gactcactatagg gagaAGGAATCACTGCTGGCATT  
R-chr18\_3\_T7 ccaagcttctaatac gactcactatagg gagaGGCATTACTTTGACCAGGTG  
R-chr18\_4\_T7 ccaagcttctaatac gactcactatagg gagaCCCTCCAGTTTATTTACTTTGATACT  
L\_Ch8\_T7 ccaagcttctaatac gactcactatagg gagaCCATAAAGGCCTTCTCAAGC  
R\_Ch8\_T7 ccaagcttctaatac gactcactatagg gagaCAGAGTTCATTACCTGCTCA  
L\_Ch10/17\_T7 ccaagcttctaatac gactcactatagg gagaGGGAAATTGCTAAGCTGATGA  
R\_Ch10\_T7 ccaagcttctaatac gactcactatagg gagaCAGATCCCATGTTCTGATGC  
R\_Ch17\_T7 ccaagcttctaatac gactcactatagg gagaGTTCATTACCTGCGCATCAG  
L-Chr9-FISHT7 ccaagcttctaatac gactcactatagg gagaGCATGCTCATTGAAGACC  
R-Chr9-FISHT7 ccaagcttctaatac gactcactatagg gagaACCAAGAGGGACTAGAGCTT  
L-ChrX-FISHT7 ccaagcttctaatac gactcactatagg gagaGTGAAGGATTCAGCAAAGC  
R-ChrX-FISHT7 ccaagcttctaatac gactcactatagg gagaGAACTGGAGTGAATGTGTCA

## **Primers**

### **RNA-seq validation and qPCR primers**

L-chr18\_1 GGGGGTTAGGGGTAAGGTTT  
R-chr18\_1 AGGAATCACTGCTGGCATT  
L-chr18\_2 CCAAAGTACAGGTGACATGGTG

|            |                            |
|------------|----------------------------|
| R-chr18_2  | ACTGACACTGGCCTCACCTC       |
| L-chr18_3  | CGCTGAAGAGAAACCCTGTG       |
| R-chr18_3  | GGCATTACTTTGACCAGGTG       |
| L-chr18_4  | CAGGTTAGGGTGAGCTTTAGTG     |
| R-chr18_4  | CCCTCCAGTTTATTTACTTTGATACT |
| L-chr18_5  | TGAGAGGGATACTGGTCCTTG      |
| R-chr18_5  | CAGCTGCTTCCATTGCATTA       |
| L-chr18_6  | AAATCCTTTGCCTCTCATGG       |
| R-chr18_6  | GGCTTACGCATAGGATCTCAA      |
| L-chr18_7  | CATCATTGCAATCTTCGAGTG      |
| R-chr18_7  | TGGAGATTACAGTGTTGTGAATAGG  |
| L-chr18_8  | GGCATGAATTTGCCTCTGAA       |
| R-chr18_8  | CCGACTGCTCTTCTGAAGGT       |
| L-chr18_9  | GCCCAATTATTTGCAAGACC       |
| R-chr18_9  | CCCTCTCTCCCCTGTAAAAA       |
| L-chr18_10 | CTGTGTGACGTGCTCCCTGT       |
| R-chr18_10 | TGACCTCACAGGTGGCAGAA       |
| L-chr18_11 | CAGCTGAGACATGAAACATGG      |
| R-chr18_11 | GGCTTGGATTGAGTCCTTCA       |
| L-chr18_12 | AGCAAACTGGCAGAAACTCA       |
| R-chr18_12 | CTTCACCTGGTGTGGGATT        |
| L-chr18_13 | TAAGTGGGGAAAGCACCAGA       |
| R-chr18_13 | AAGCATCAGTAACAAGGAGACAA    |
| L-chr18_14 | TAAAACCTTTGCAGCCCATC       |
| R-chr18_14 | AAGCCCACTGCCATAGTGAT       |
| L-chr18_15 | CAACCTCGCATCTTTCATCA       |

|            |                            |
|------------|----------------------------|
| R-chr18_15 | AGCGGATCCTTTCAACACAC       |
| L-chr18_16 | GAAATGCTCCAAGAGATGGAA      |
| R-chr18_16 | CCTGCTTCACTTTTGTCTTG       |
| L-chr18_18 | GAGGACTATTACCGCACACATT     |
| R-chr18_18 | ATGGAACCAGCGCTACATCT       |
| L-chr18_19 | GTGGCACACGCCTTTAATC        |
| R-chr18_19 | TTGCCATTTTTGTGTTTTGC       |
| L-chr18_20 | TCAGGGAAATAATCCCATTCA      |
| R-chr18_20 | GTTTTTGAAGCCGGGTCTCT       |
| L-chr18_21 | ACAGGTGGAGCCCTGAGATT       |
| R-chr18_21 | ATGGTGAGGGAGGATCTTTT       |
| L-chr18_22 | TTCTTTCCACCTTGATGATAATAGAC |
| R-chr18_22 | GGCATTACTTTGACCAGGTGT      |
| L-chr18_23 | CCCTCTGTATTCAAACTCAATG     |
| R-chr18_23 | TGAAGTTCAGAATGGTATGCAA     |
| L-chr18_24 | TCTCTCCAGCCCAGATGATT       |
| R-chr18_24 | TGGCAAAGTAAACCAGGACA       |
| L-chr18_25 | CTCCCAGGGCAGAAGAGTTT       |
| R-chr18_25 | TGCCCTTTGTCTTAGTCTGG       |
| L-chr18_26 | GGTCCTTGTATAGCTGCAACTCAG   |
| R-chr18_26 | TGCTTATCGTGTCTTGAAGTGG     |
| L-chr18_27 | TGAGTCCCAGACCAATGGA        |
| R-chr18_27 | CCATGAGAAGCAGTTACAGAGC     |
| L-chr18_28 | AACTCGTCTCGATGCTCTGG       |
| R-chr18_28 | TGGGTCAGGGTTTAGGAGAA       |
| L-chr18_29 | TCACCAGCAGTCTTTCAAGG       |



|            |                             |
|------------|-----------------------------|
| R-chr18_29 | CTCAAACAGGAGACCCAAGC        |
| L-chr18_30 | CCAGCAGTCTTTCAAGGTTTTT      |
| R-chr18_30 | CCCTAACAACCCTAACCCTGA       |
| L-chr18_31 | TTAGCCGGGAAGTCTTTCAA        |
| R-chr18_31 | ACTACTGGTTAAGGTATGCACCA     |
| L-chr18_32 | TGGCCTGCCACAGATTTTA         |
| R-chr18_32 | TCCCTAACCCTAACAACCCTAAC     |
| L-chr18_33 | TGCTAAGGAGGAAAAGGCTAA       |
| R-chr18_33 | CCCTAACAACCCTAACCCTGA       |
| L-chr18_34 | TGGTGCATACCTTAACCAGTAGT     |
| R-chr18_34 | CTCACACTTCATACATATACTTTTTGG |
| L-chr18_35 | CCTTAACCAGTAGTATTCTGAAGTCAC |
| R-chr18_35 | GCCTTTTCCTCCTTAGCAGT        |
| L-Chr1-1   | ATACACCCGGTTTGGATG          |
| R-Chr1-1   | CTTGTGGCTCTTGGTATCTT        |
| L-Chr1-2   | ACAAGCTGACCTGTGAGTTC        |
| R-Chr1-2   | ATCTGGGACAAAGGCAAG          |
| L-chr2_6   | GAGTGCCTTACTATCTCCTAAGTTTT  |
| R-chr2_6   | TGGAGTTAATTTTGTGGAGGTTG     |
| L-Chr2-13  | CGAGTCTCAGAAAAGGGCAG        |
| R-Chr2-13  | TCACCAATTCTCCAACAGGG        |
| L-Chr5-7   | GAAGACTGAGGCAGAAGAGTT       |
| R-Chr5-7   | TGAGATCCCTTGCTACTTGC        |
| L-Chr5-8   | CTGAACCTTGTAGTTCCTCTG       |
| R-Chr5-8   | CTGTGAAAGGGTCATTCAAC        |
| L-chr6_3   | AGGTGTTCTGAGGCAAGCTC        |

|           |                            |
|-----------|----------------------------|
| R-chr6_3  | AAGACCCACCACACCAGTTC       |
| L-Chr6-4  | CTGCAATTGGGAAGAGCA         |
| R-Chr6-4  | CAGAGGGTTTCTCTCCAGTA       |
| L-Chr7-1  | GGGCTTTGTTATCTTGCTG        |
| R-Chr7-1  | AGAGTCATGTGGCTATCAGTC      |
| L-Chr7-2  | TAAGGACACAGGCCATACAC       |
| R-Chr7-2  | CCACTCAGCTCAGACATACA       |
| L-Chr9-1  | GCATGCTCATTGAAGACCAG       |
| R-Chr9-1  | ATTGGTCTCTGAGGTCTTGC       |
| L-Chr9-2  | TGCCTCTCAAGTGCTGTT         |
| R-Chr9-2  | GTAGGCATTGTGTCAGTCTCA      |
| L-Chr11-7 | TGTATTTGAAATTGATTATGAGAAGT |
| R-Chr11-7 | TAAAGCCTTTGTACATCAATATG    |
| L-Chr11-8 | GGCTTTACCACATTGACTACA      |
| R-Chr11-8 | CTTTGCTTCTCCTGCTCAAC       |
| L-Chr12-1 | TTTGGCTACTGAGCAACTG        |
| R-Chr12-1 | CCAGAAACGTTCCATACTAAC      |
| L-Chr12-2 | CAAGCTTTGTTCCCTCAG         |
| R-Chr12-2 | AAAGCAATTTAAGATTTGTAGCA    |
| L-Chr13-4 | CAATGAAACTCCACCCACAG       |
| R-Chr13-4 | TCTGCCTCACCATCTGTGTA       |
| L-Chr13-5 | CCAAGACCCAGCTTCTGATTC      |
| R-Chr13-5 | TTTTGATGGTGTCTCTTGGGA      |
| L-Chr14-1 | GAGCTCAGATGCATCACTGT       |
| R-Chr14-1 | TTGATGAACAAAGGTCCTG        |
| L-Chr14-2 | TACCACCTACTAGCCTCCAGT      |

R-Chr14-2 GAGTATGACCTAACCCCTGACTC  
L-Chr15-1 CAGAATGGGTCAAGGATAGC  
R-Chr15-1 CTCAAGTGCTGAAGGATGAC  
L-Chr15-2 CTTCCCTTCCCTCTTCTGTA  
R-Chr15-2 TGGGTTAGACCTTATCTGAGTT  
L-Chr16-1 TGTAATTGGAGAGTACTATGATATGC  
R-Chr16-1 ATTACACATACTGGAGAGAAATCTTAC  
L-Chr16-2 CATGTGTAAGGTTTCTCTCCAGT  
R-Chr16-2 CAATGTAGTAAATCCTTTGCTTCTC  
L-Chr19-1 GTCTCCAACATCACATCTCTG  
R-Chr19-1 GATGTGCATGTGAACTTTACTC  
L-Chr19-2 CTTACATTCATAGGGTTTCTCTCTAGT  
R-Chr19-2 GTGGTAAAGCCTTTGCATATCATAAC  
L-ChrX-1 GAGGTTCCCTGTAAGTCTCCA  
R-ChrX-1 CCTATGATGATGTGCATGTG  
L-ChrX-2 GTTACAGAGAACTCGCATCTTC  
R-ChrX-2 GGGCAATACCCTTTGTCC  
L\_Ch8-1 TCAATGCATCAGCAGCAG  
R\_Ch8-1 GGTAATGTTGCCTGATGAGC  
L-Chr8-B ATGAGCAGGTAATGAACTCTG  
R\_Ch8-B GTGTGGGAGGATAGTCATGTA  
L\_Ch10-seg1 GTCTCAAGTGAAACAGACTGC  
R\_Ch10-seg1 GCAGTTCCAGAAAGATCACTG  
L\_Ch10-seg2 TCAGCAAATCATGGTTCAGAT  
R\_Ch17\_1 TCTCAAGTGAAACAGACTGC  
L-\_Chr17EST TGTCAAAGTTCCAGAAAACATGG

R-Chr17EST CTTTTGGGGATGACTGTGACAT

## RACE

|                |                            |
|----------------|----------------------------|
| GSP1           | CTGTGAAGGACAAAGGCTGT       |
| NGSP           | ACAGGGTTTCAGTGAATGGA       |
| NUP            | AAGCAGTGGTATCAACGCAGAGT    |
| NUP_revisado   | AGTGGTATCAACGCAGAGT        |
| R-nested3kb-1  | GAGAATGCAAAGGCTTTACCAC     |
| 3'NGSP         | CTGGGGAAAGAGGAATGAAA       |
| 5RACE_GSP26    | CACCAGTGCAGCGGTTTCAGCTTTA  |
| 5RACE_NGSP26   | GCACTTCAGAGCCATCAGCTGCTTC  |
| 5RACE_NGSP21   | CCCTCTCATAGCCTTTGGCAACCAC  |
| 5RACE_NGSP28   | ACGGCTCTCTGAAGGTTTGCTGGAA  |
| 5RACE_GSP28    | TTGCCATTGGTAAGCCACTGAGCTG  |
| 5RACE_NGSP29   | AAGAAAGCAGGCTAAGCAGGCCACA  |
| 5RACE_GSP29    | TTGATATGGGAAGGCCAGACCACT   |
| 3RACE_NGSP3-1: | GGTTGGCTGGGGAAAGAGGAATGAA  |
| 3RACE_GSP3-1   | CGCTGAAGAGAAACCCTGTGAATGTG |
| 3RACE_NGSP26   | GAATGGCAAGCCACTTCAAGACACG  |
| 3RACE_GSP26    | AGCAGCTGATGGCTCTGAAGTGCTG  |
| 3RACE_GSP27    | ACTGTGCAGGCCTTCTCACCAAACA  |
| 3RACE_NGSP27   | AGTGTGGGGGCACCCTCAGAGACTA  |
| 3RACE_GSP28    | GCAAACCTTCAGAGAGCCGTGGAGA  |
| 3RACE_NGSP28   | TGCACATCAGCTCAGTGGCTTACCA  |
| 3RACE_GSP29    | TGTGGCCTGCTTAGCCTGCTTTCTT  |
| 3RACE_NGSP29   | TGGCTCTTAGCCGGGAAGTCTTTCA  |

|                |                            |
|----------------|----------------------------|
| 3RACE_NNGSP29  | GGTATGAGGAGTTCATGGTGACAAGC |
| 5RACE_N_NGSP28 | GCTCATCTTCAAAGGGGACTTCTTCC |
| 5RACE_R_GSP29  | GAAAGACTTCCCGGCTAAGAGCCAAG |
| L-GSP31sin29   | TCCACAGTACAGAGGTGAGGCCAGTG |
| L-NGSP31sin29  | GAGGCCAGTGTCAGTCTGTCCCTTCT |
| L-GSP30sin31   | GGTTAGGGTCAAGGTCAGGGTTAGGG |
| L-NGSP30sin31  | GGGTCAAGGTCAGGGTTAGGGTTGTT |

### **Promoter cloning**

|                   |                                         |
|-------------------|-----------------------------------------|
| L-PromoA1-KpnI    | CGGGGTACCCCGTTTAGGCTCCCCTGCATTTA        |
| R-PromoA1-HindIII | CCCAAGCTTGGGCCTGAGGCTAATTCTCCCACT       |
| L-PromoA2-KpnI    | CGGGGTACCCCGCCAATGCAATGTGGTCAGTC        |
| R-PromoA2-HindIII | CCCAAGCTTGGGAAATTGCAGGTAGTTTTCACTGG     |
| L-PromoA3-KpnI    | CGGGGTACCCCGAAGGACTCAATCCAAGCCAAT       |
| R-PromoA3-BglII   | GAAGATCTTCTCACACAGGACCACTCAAGC          |
| L-PromoB1-KpnI    | CGGGGTACCCCGTTGTTTTCATTTTTGAAGACAGAG    |
| R-PromoB1-HindIII | CCCAAGCTTGGGACAGAAAAGCATCAGTAACAAGGA    |
| L-PromoB2-KpnI    | CGGGGTACCCCGTGAGGTGAATAAATCAGGTTCA      |
| R-PromoB2-HindIII | CCCAAGCTTGGGGCTCAGAGCTTTACCACACTG       |
| L-PromoB3-KpnI    | CGGGGTACCCCGGAAAAATCTCATAGAGAAAACAGATGC |
| R-PromoB3-BglII   | GAAGATCTTACGATGGGCTGCAAAGGT             |
| L-PromoC1-KpnI    | CGGGGTACCCCGACTCTCAGCTCCTCCAGCAC        |
| R-PromoC1-BglII   | GAAGATCTTCGCTGGCCTTGA ACTCAGAAA         |
| L-PromoC2-KpnI    | CGGGGTACCCCGAGCCAGGGTGAAACAGAGAA        |
| R-PromoC2-BglII   | GAAGATCTTCATGGTGAGGGAGGATCTTTT          |
| L-PromoD-KpnI     | CGGGGTACCCCGTTAAAAGATCCTCCCTCACCA       |

|                    |                                  |
|--------------------|----------------------------------|
| R-PromoD-BglIII    | GAAGATCTTCTTGAAATCAACCCAAAATGC   |
| L-PromoChIP-KpnI   | CGGGGTACCCCGTGGGAGCAGCTTTCTAGTGG |
| R-PromoChIP-BglIII | GAAGATCTTCGGAAAGCCTTGCTTGTTTCAG  |

## RT-qPCR

|                  |                           |
|------------------|---------------------------|
| L-qPCR_5R1.5kb   | TGCATTCATACGGTTCTCTCC     |
| R-qPCR_5R1.5kb   | GGCATGAAAGAATTCATACTAGAGA |
| L-qPCR-3R-NGSP31 | GAGGAGTTCATGGTGACAAGC     |
| R-qPCR-3R-NGSP31 | AGGCCAAAGAAGGGACAGAC      |
| L-qPCR-3RNGSP28  | AAGGCAAGGGAAAAGGAGAC      |
| R-qPCR-3RNGSP28  | GGGGACACTCACTGAAGCTC      |
| L-qPCR-Malat1    | GTTACCAGCCCAAACCTCAA      |
| R-qPCR-Malat1    | CACTTGTGGGGAGACCTTGT      |
| L-Cytb           | ATTCCTTCATGTCCGACGAG      |
| R-Cytb           | ACTGAGAAGCCCCCTCAAAT      |
| L-cyclinD2-qPCR  | CCAGCAAAAAGGAGAAGCTGT     |
| R-cyclinD2-qPCR  | TTCCAGTTGCAATCATCGAC      |
| L-qPCR-Chr18     | GCAAGCTCCGAAGTTGTGAT      |
| R-qPCR-Chr18     | CGCTTCTGTGAAGGATCCAG      |
| L-qPCR-Chr8      | TCCCCTGTCAATAACAGAC       |
| R-qPCR-Chr8      | CAAGCACAGGCTAGAAGTG       |
| L-qPCR-Chr10     | TCAGCAAATCATGGTTCAGAT     |
| R-qPCR-Chr10     | TGCATTGCATTTGACAACAG      |
| L-qPCR_Chr17     | TGTCAAAGTTCCAGAAAACATGG   |
| R-qPCR_Chr17     | CTTTTGGGGATGACTGTGACAT    |

qPCR primers for other chromosomes can be found in the RNA-seq validation section

## **Chromosome-18 TERRA promoter regions**

### **>Region A2**

CATGAGGTC CCTATTTGGCTATCCAATGCAATGTGGTCAGTCTTGAAATCTATACATACAACCAACA  
GAAATGGGCTCAGCAAGTTTTATTCATATGTTTGAGCATACTTACTTGATTCTCAGCTAAGACCTTGT  
AGTATAAGGTGAACATTCCAGAGACATTTCTGTCTATCATTTTTATAATTTACATATGTTTCTGTTGA  
CTTTGAATTAAGAATGTCCTTATATATCTCTGCTTTGACATTGTGACCATGTTTCAGAATTTAATTTAG  
CATGCTTAGGAGTAAGCAAACCTATATGTTATCTAGACTCTGTAAGTAAAATCTCAATGTCTTCCTTT  
ATTGAAGAAAAGTATTGCCATGGAAAGGACTCCCATACTTTCCCTTGCCTGCCACAGGAAAAAAAAA  
AATCTCAGTTCTTTTGTCTTGGCATTGTGATGGCTATTCTTTTTTTTTTTTTTTTTTTTTTTTAAAGATT  
TATTTATTTATTATATGTAAGTACACTGTAGCTGTCCCTCAGACACTCCAGAAGAGGGCGTCAGATCT  
TGTTACAGATGGTTGTGAGCCACCATGTGGTTGCTGGGATTTGAACTCTGGACCTTCGGAAGAGCAG  
TCGGGTGCTCTTACCCACTGAGCCATCTCACCAGCCTGGCTATTCTTGACTATATCTGAAATTAACTA  
AAATTCAAAGAGGTGGGTACTGTAGGAGATTTTTCTTAATTATAACTTTTGAAATGGAAAAACCCTT  
CTTTAATCTGGCTCTTTTGAGGTGATAAGATCTAGGCCACAGCTTCCCATTGTAATATATATATATAA  
AACAATATATATGTAAAACCTATATATATATATATATAGTTATATATATAATTTTTTTCTGCTTGCTCTAC  
CTCTACTTAGCAAGTTCTTTTATTATTGGCATTAGACTCTACTTTAGAATTCTGGTATATACTGAAGA  
GCAGCTGAGACATGAAACATGGACTGAACCAATATTAAGTACTAGCCATTGTTGGACTAATTGGACTGTT  
GCCAGTGTAATATTCTAATAAAGCCACATTATATGAAGTTGGTTCATCTAGAGAACCTTCACTAATA  
CAGCTCTGTGTGAGAATGTGTGTTCACTTACCACTGAGGAAGATGTGCTGGGTAATAATAGTGCGCC  
ACAGGGTTTGTCTGTTTCTGTTTTTCTCCCAAGGTTCTCATACTACCAGTGAAAACCTACCTGC  
AATTTACCTAAGTCCAGCAT

### **>Region A3**

GAAGGACTCAATCCAAGCCAATTAGAGTATTTGACAGTTTACTGGGAGCAGCTTTCTAGTGGGTTCA  
CTGATCACTTGAGACCAGAGAGAGAATGGGGGGGGGGGGGAGAAGCAAGCAGGAAGAGAAAAAT

GCAGGGGCGGGGAGGGAGGGACAGGGAAAGTGGAGGAGGAAGGAGAGGGAGGGAGGAGAGAG  
ACACAGAGACAAAGAGCACAAAATGTCTCAATTATATAGGAAGAGCTTCTGAGGGAGGGAAAGCC  
CAGCCCCTGGACTGGAAAGTTCAGTGTATAAGGCAGAGTATGCCAGCCATGCCCTGTAACAGGTGG  
GGACTGAGGAGTGTGGGAGAACCTGGAGGTCCAGCCGGCCTTGGTGTGTTCAATGTGCACTTCAGT  
CGCTTGTCCCAGGTCTGAATCCCCACAGCCACAAAACAAAATTATTATTCCCCCAAATCTCTTTTTAA  
TTGTTAATGTTCTATGCACCATTTCACTTGTAGGACAGATTGATAACTCCACTGCAAATTGAGTAATG  
GGCTATGCAAGCTATCTACCCTGATTCCAGGAGGAAGAAGGGAAAGAGCCTACTTGTGAAATCTCA  
GGCTGAAGTCAGGACCTAGTGAGCACAGAGTCACTACCCACAAAAGGGAGGAGCAGGCAGCGGCT  
GAGCTGTGGTAGCTGGAGTAGTAGGTCTTCCGGGGGGATGGGTGGGGAGACGGATAGCCAATTAGA  
GAACAAACACAAGTTCTACTATAATGCAAATCCCTGCGGATCTGGAAAAGGTCTGGCCCTGGACTG  
GGCGCCTGAGAACCTTTCACTGTGTCCTTTCAGCACACTCTAACCTAAGGTAGGTGCTCATGTCA  
CTCAAGACTCACTGGCCAATCAGAGCCTTCAGGAGAACCTTCCAATCAGAAGATGAGGCGGTTTCTT  
CCGGGTGCCTTGCTGCAGGTTCCGCTTAATAGCTTATCAGGCTTGAGTGGTCCTGTGTGACGTGCTCC  
CTGTCTGG

### **RACE sequences**

Below are 25 representative RACE sequences. The remaining ones are also available upon request to the authors

>5R\_1.5kbclon21\_3set

ACAGGGTTTCAGTGAATGGAAGTTTGAATACTTCTGTTGCAATAAGAACTATTCAACACATTCACAG  
GGTTTCTCTTCAGCGTGTTATCTTTTATGCCCTTTGTCTTAGTCTGGGTTTTATTGCTGTGAAAAAGAT  
ACTATGACCAAGACAACACTTATAAAGGACAACATTTATTTGAAGTTCTGTACAGATTCAGAGGTT  
CAGTCTATTATCATCAAGGTGGAAAGAATAGCAGTGTCCAGCAGGCATGGTGCTGGAGGAGCTGAG  
AGTTTTACATCTTGATTAGAAGGCACCCAGAAAACCTTCTGCCCTGGGAGGGGCTTACGCATAGGA  
TCTCAAAGCCCCTGCCATAGTGATCCACTTCCTCAAAGAAGGCCACAACCTCCTAATAGTGCCACTT  
GCCATGGGCCAAGCATATTCAAACCTTCATACCTTTGAAGATCACTGTGACCTGTAAAGGCTCTATC



ACATTGGTTACAGTCATAGTATGTGTTCTTTTATGTCTTTGGAGATGACTGTGTCGTGAATAGGCTTT  
ATCACATCCATTACATTTGTAGGGTTTCTCTCCAGTGTGAATTATTTTCATGACTTTGAAGTTGGCCAT  
GAGGGGCAAAGGATTTACTACATTGCTTACATTCATAAAGGCTTCTCTCCAGTATGTGTTGCTTTATGT  
ATTTGGAGACTAGTGTTACTCACAAAGGCTTTACCACATTGAGTGTGAATACAGAGGGTTTCTCTC  
CAGTATGACTTCTTTCATGCCTTCTATGTCTTCTAGAACTTTGACAATGTTCTTCAATGTTATGGTATT  
CCCAATTGTAGCCTATAGCAGTGAGGTTCTTGTAGGTCTCCAGCATCACATCTTTGTAGAGACGCTT  
CTGTGAAGGATCCAGCAAAGCCCATTCTTCTCGAGTCAAGTTTACATGCACATCATCATAGGTCACT  
GCATCCATATCACAACCTTCGGAGCTTGCCCTGAGCGCGCTTCACAGCATCAGCCGCCAGACAGGGAG  
CACGTCACACAGGACCACTCAAGCCTGATAAGCTATTCCCCATGTA CTCTGCGTTGATACCACTGCT  
T

>5R\_1.5kbelon7\_3set

ACAGGGTTTCAGTGAATGGAAGTTTGAATACTTCTGTTGCAATAAGAACTATTCAACACATTCACAG  
GGTTTCTCTTCAGCGTGTTATCTTTTATGCCCTTTGTCTTAGTCTGGGTTTTATTGCTGCGAAAAAGAT  
ACTATGACCAAGACAACACTTATAAAGGACAACATTTATTTGAAGGTTCTGTACAGATTCAGAGGTT  
CAGTCTATTATCATCAAGGTGGAAAGAATAGCAGTGTCCAGCAGACATGGTGCTGGAGGAGCTGAG  
AGTTTTACATCTTGATTAGAAGGCACCCAGAAAACCTTCTGCCCCTGGGAGAGGCTTACGCATAGGA  
TCTCAAAGCCCCTGCCATAGTGATCCACTTCCTCAAAGAAGGCCACAACCTCCTAATAGTGCCACTT  
GCCATGGGCCAAGCATATTCAAACCTTCATACCTTTGAAGATCACTGTGACCTGTAAAGGCTCTATC  
ACATTGGTTACAGTCATAGTATGTGTTCTTTTATGCCTTTGGAGATGACTGTGTCGTGAATAGGCTTT  
ATCACATCCATTACATTTGTAGGGTTTCTCTCCAGTGTGAATTATTTTCATGACTTTGAAGTTGGCCAT  
GAGAGGCAAAGGATTTACTACATTGCTTACATTCATAAAGGCTTCTCTCCAGTATGTGTTGCTTTATGT  
ATTTGGAGACTAGTGTTACTCACAAAGGCTTTACCACATTCATTACATATGTAAGGTTTCTCACCAGT  
ATGAATTTTTTTCATGTCTTTTAAGAACATTCTGACCTGCAAAGGCTTTACCACATTGATTGCATTCAT  
ACGGTTTCTCTCCAGTATGTGTTCTTTTATGTACTTGGAGATAACCAGGATATGCAAAGCTTTATCA  
CATTGACTGCATTCATAGGGTTTCTCTCCAGTATGTGTTCTTTTATGTACTTGGAGATAACTATGAGN  
TGCAAAGGCTTTACCACATTGATTACATTTTCATAGGGNTTCTNCTCAGTATGTTGTTCTTTTTATGTA

CTTGAGATAACTATGAGATGCAAAGGCTTTACCACATTGATTACATTCATAGGGTTTCTCTCCAGT  
ATGTGTTCTTTTATGTACTTGGAGATAACGATGGGCTGCAAAGGTTTACCACAGTGATTACATTCAT  
AGGGTTTCTCTCCAGTATGCGTTCCTTTATGTATTTGAAGATGATCATGATATACAAAGGCTTTACCA  
CATTGATTACATTCATGGGGTTTCTCTCCAGTATGTGTACTTTTATGTACTTGGAGATAACGATGAGA  
TGCAAAGGCTTTACCACATAGATTACATTTGTAAGGTTTCTCTCCAGTGTGTGTTGTTTTATGTCTTT  
GAAGATAACCATAATATACAAAGGCTTTACCACATTGATTACATTTATAGGACTTCTCTCCAGTATG  
TGTACTTTTATGTATTTGGAGATTACAGTGTGTGAATAGGCTTTATCACATTGATTGCATTTGTAGG  
GCTTCTCTGCGTTGATACCACTGCTTCCCATGTACTCTGCGTTGATACCACTGCTT

>5R\_2kbclon13

ACAGGGTTTCAGTGAATGGAAGTTTGAATACTTCTGTTGCAATAAGAACTATTCAACACATTCACAG  
GGTTTCTCTTCAGCGTGTTATCTTTTATGCCCTTTGTCTTAGTCTGGGTTTTATTGCTGTGAAAAAGAT  
ACTATGACCAAGACAACACTTATAAAGGACAACATTTATTTGAAGGTTCTGTACAGATTCAGAGGTT  
CAGTCTATTATCATCAAGGTGGAAAGAATAGCAGTGTCCAGCAGACATGGTGCTGGAGGAGCTGAG  
AGTTTTACATCTTGATTAGAAGGCACCCAGAAAACCTTCTGCCCCTGGGAGGGGCTTACGCATAGGA  
TCTCAAAGCCCCTGCCATAGTGATCCACTTCTCAAAGAAGGCCACAACCTCCTAATAGTGCCACTT  
GCCATGGGCCAAGCATATTCAAACCTTCCATACCTTTGAAGATCACTGTGACCTGTAAAGGCTCTATC  
ACATTGGTTACAGTCATAGTATGTGTTCTTTTATGTCTTTGGAGATGACTGTGTCNTGAATAGGCTTT  
ATCACATCCATTACATTTGTAGGGTTTCTCTCCAGTGTGAATTATTTTCATGACTTTGAAGTTGGCCAT  
GAGAGGCAAAGGATTTACTACATTGCTTACATTCATAAGGCTTTCTCTCCAGTATGTGTTGCTTTTAT  
GTATTTGGAGACTAGTGTTACTTCACAGAGGCTTTTACCACATTTATTACATATGTAAGGTTTCTCA  
CCAGTATGAATTTTTTTCATGTCTTTTAAGAACATTCTGACCTGCAAAGGCTTTTACCACATTGATTGC  
ATTCATACGGTTCTCTCCANATGTGTTCTTTACGTACTTGGAGAATACTGTGATGTACCAAGGCTTCA  
TCATATTGAACACCTTCATAGGATTTCTCTCTAGTATGAATTCCTTCATGCCTTTGAGGATAAGTGTG  
ACATGCAAAGGCTTTACCACATTGAGTGTGTAATACAGAGGGTTTCTCTCCAGTATGACTTCTTTCAT  
GCCTTCTATGTCTTCTAGAACTTTGACAATGTTCTTCAATGTTATGGTATTCCCAATTGTAGCCTATA  
GCAGTGAGGTTCTTGTAGGTCTCCAGCATCACATCTTTGTAGAGACGCTTCTGTGAAGGATCCAGCA

AAGCCCATTCTTCTCGAGTCAAGTTTACATGCACATCATCATAGGTCACTGCATCCATATCACAACCTT  
CGGAGCTTGCCTGAGCGCGCTTACAGCATCAGCCGCCAGACAGGGAGCACGTACACAGGACCAC  
TCAAGCCTGATAAGCTATTAAGCGGCCCCATGTACTCTGCGTTGATAACCACTGCTT

>5R\_2kbclon10

AAGCAGTGGTATCAACGCAGAGTACATGGGGAGAAGATGAGGCGGTTTCTTCCGGGTGCCTTGCTG  
CAGGTTCCGCTTAATAGCTTATCAGGCTTGAGTGGTCCTGTGTGACGTGCTCCCTGTCTGGCGGCTG  
ATGCTGTGGAGCGCGCTCAGGCAAGCTCCGAAGTTGTGATATGGATGCAGTGACCTATGATGATGT  
GCATGTAAACTTGACTCGAGAAGAATGGGCTTTGCTGGATCCTTCACAGAAGCGTCTCTACAAAGAT  
GTGATGCTGGAGACCTACAAGAACCTCACTGCTATAGGCTACAATTGGGAATACCATAACATTGAA  
GAACATTGTCAAAGTTCTAGAAGACATAGAAGGCATGAAAGAAGTCATACTGGAGAGAAACCCTCT  
GTATTCAACACTCAATGTGGTAAAGCCTTTGCATGTCACACTTATCCTCAAAGGCATGAAAGAATC  
ATACTAGAGAGAAATCCTATGAAGGTGTTCAATATGATGAAGCCTTGGTACATCACAGTAATCTCCA  
AGCACATAAAAGAACACATCCTAAAGAGAAACCCTACAAATGCGATCAATGTGATAAAGCCTATTC  
ACAACATAGTCATCTCAAAGACATAAAAGAAAACACACTGGAGAGAAACCTTATGAATGTAAGCA  
ATGTGGCAAAGCCTTTGCATACCATTCTGAACTTCAGAGTCATGAAAGAATTCATACTGGAGAGAA  
ACCCTACAAATGTAATCAATGTGGTAAAGCCTTTGCACATCATTGCAATCTTCGAGTGCATAAAATA  
ATACATACTGGAGAGAAGCCCTACAAATGCAATCAATGTGATAAAGCCTATTACAAACACTGTAAT  
CTCCAAATACATAAAAGTACACATACTATGACTGTAACCAATGTGATAGAGCCTTTACAGGTCACAG  
TGATCTTCAAAGGTATGGAAGTTTGAATATGCTTGGCCCATGGCAAGTGGCACTATTAGGAGTTGTG  
GCCTTCTTTGAGGAAGTGGATCACTATGGCAGTGGGCTTTGAGATCCTATGCGTAAGCCCCTCCCAG  
GGCAGAAGAGTTTTCTGGGTGCCTTCTAATCAAGATGTAAAACCTCTCAGCTCCTCCAGCACCATGTC  
TGCTGGACACTGCTATTCTTTCCACCTTGATGATAATAGACTGAACCTCTGAATCTGTACAGAACCTT  
CAAATAAATGTTGTCCTTTATAAGTGTTGTCTTGGTCATAGTATCTTTTTTCACAGCAATAAAACCCAG  
ACTAAGACAAAGGGCATAAAAGATAACACGCTGAAGAGAAACCCTGTGAATGTGTTGAATAGTTCT  
TATTGCAACAGAAGTATTCAAACCTCCATTCCTGAAACCCTGT

>5R\_1.5kbclon13

ACAGGGTTTCAGTGAATGGAAGTTTGAATACTTCTGTTGCAATAAGAACTATTCAACACATTCACAG  
GGTTTCTCTTCAGCGTGTTATCTTTTATGCCCTTTGTCTTAGTCTGGGTTTTATTGCTGTGAAAAAGAT  
ACTATGACCAAGACAACACTTATAAAGGACAACATTTATTTGAAGGTTCTGTACAGATTCAGAGGTT  
CAGTCTATTATCATCAAGGTGGAAAGAATAGCAGTGTCCAGCAGACATGGTGCTGGAGGAGCTGAG  
AGTTTTACATCTTGATTAGAAGGCACCCAGAAAACCTCTTCTGCCCTGGGAGGGGCTTACGCATAGGA  
TCTCAAAGCCCACTGCCATAGTGATCCACTTCCTCAAAGAAGGCCACAACCTCCTAATAGTGCCACTT  
GCCATGGGCCAAGCATATTCAAACCTTCATACCTTTGAAGATCACTGTGACCTGTAAAGGCTCTATC  
ACATTGGTTACAGTCATAGTATGTGTTCTTTTATGTCTTTGGAGATGACTGTGTCNTGAATAGGCTTT  
ATCACATCCATTACATTTGTAGGGTTTCTCTCCAGTGTGAATTATTTTCATGACTTTGAAGTTGGCCAT  
GAGAGGCAAAGGATTTACTACATTGCTTACATTCATAAGGCTTTCTCTCCAGTATGTGTTGCTTTTAT  
GTATTTGGAGACTAGTGTTACTTCACAGAGGCTTTTACCACATTTATTACATATGTAAGGTTTCTCA  
CCAGTATGAATTTTTTTCATGTCTTTTAAGAACATTCTGACCTGCAAAGGCTTTTACCACATTGATTGC  
ATTCATACGGTTCTCTCCANATGTGTTCTTTACGTACTTGGAGAATACTGTGATGTACCAAGGCTTCA  
TCATATTGAACACCTTCATAGGATTTCTCTCTAGTATGAATTCTTTCATGCCTTTGAGGATAAGTGTG  
ACATGCAAAGGCTTTACCACATTGAGTGTGTAATACAGAGGGTTTCTCTCCAGTATGACTTCTTTCAT  
GCCTTCTATGTCTTCTAGAACTTTGACAATGTTCTTCAATGTTATGGTATTCCCAATTGTAGCCTATA  
GCAGTGAGGTTCTTGTAGGTCTCCAGCATCACATCTTTGTAGAGACGCTTCTGTGAAGGATCCAGCA  
AAGCCCATTCTTCTCGAGTCAAGTTTACATGCACATCATCATAGGTCATGCATCCATATCACAACCTT  
CGGAGCTTGCCTGAGCGCGCTTCACAGCATCAGCCGCCAGACAGGGAGCACGTACACAGGACCAC  
TCAAGCCTGATAAGCTATTAAGCGGCCCCATGTACTCTGCGTTGATACCACTGCTT

>5R\_2kbclon10\_3set

ACAGGGTTTCAGTGAATGGAAGTTTGAATACTTCTGTTGCAATAAGAACTATTCAACACATTCACAG  
GGTTTCTCTTCAGCGTGTTATCTTTTATGCCCTTTGTCTTAGTCTGGGTTTTATTGCTGTGAAAAAGAT  
GCTATGACCAAGACAACACTTATAAAGGACAACATTTATTTGAAGGTTCTGTACAGATTCAGAGGTT  
CAGTCTATTATCATCAAGGTGGAAAGAATAGCAGTGTCCAGCAGACATGGTGCTGGAGGAGCTGAG  
AGTTTTACATCTTGATTAGAAGGCACCCAGAAAACCTCTTCTGCCCTGGGAGGGGCTTACGCATAGGA

TCTCAAAGCCCACTGCCATAGTGATCCACTTCTCAAAGAAGGCCACAACCTCCTAATAGTGCCACTT  
GCCATGGGCCAAGCATATTCAAACCTCCATACCTTTGAAGATCACTGTGACCTGTAAAGGCTCTATC  
ACATTGGTTACAGTCATAGTATGTGTTCTTTTATGTCTTTGGAGATGACTGTGTCGTGAATAGGCTTT  
ATCACATCCATTACATTTGTAGGGTTTCTCTCCAGTGTGAATTATTTTCATGACTTTGAAGTTGGCCAT  
GAGAGGCAAGGGATTTACTACATTGCATACATTCATAAGGCTTCTCTCCAGTATGTGTTGCTTTATGT  
ATTTGGAGACTAGTGTACTCACAAAGGCTTTACCACATTCATTACATATGTAAGGTTTCTCACCAGT  
ATGAATTTTTTCATGTCTTTTAAGAACATTCTGACCTGCAAAGGCTTTACCACATTGATTGCATTCAT  
ACGGTTTCTCTCCAGTATGTGTTCTTTTATGTACTTGGAGATAACCAGGATATGCAAAAGCTTTATCA  
CATTGACTGCATTCATAGGGTTTCTCNCCAGTATGTGTTCTTTTATGTACTTGGAGATAACTATGANA  
TGCAAAGGCTTTACCANATTGATTACATTCATAGGGTTTCTCTCCAGTATGACTTCTTTCATGCCTTC  
TATGTCTTCTAGAACTTTGACAATGTTCTTCAATGTTATGGTATTCCCAATTGTAGCCTATAGCAGTG  
AGGTTCTTGTAGGTCTCCAGCATCACATCTTTGTAGAGACGCTTCTGTGAAGGATCCAGCAAAGCCC  
ATTCTTCTCGAGTCAAGTTTACATGCACATCATCATAGGTCCTGCATCCATATCACAACCTTCGGAG  
CTTGCCTGAGCGCGCTTCACAGCATCAGCCGCCAGACAGGGAGCACGTCACACAGGACCACTCAAG  
CCTGATAAGCTATTAAGCGGAACCTGCCCCCATGTACTCTGCGTTGATACCACTGCTT

>5R\_2kbclon43\_3set

ACAGGGTTTCAGTGAATGGAAGTTTGAATACTTCTGTTGCAATAAGAACTATTCAACACATTCACAG  
GGTTTCTCTTCAGCGTGTGCATCTTTTATGCCCTTTGTCTTAGTCTGGGTTTTATTGCTGTGAAAAGAT  
ACTATGACCAAGACAACACTTATAAAGGACAACATTTATTTGAAGTTCTGTACAGATTCAGAGGTT  
CGGTCTATTATCATCAAGGTGGAAAGAATAGCAGTGTCCAGCAGACATGGTGCTGGAGGAGCTGAG  
AGTTTTACATCTTGATTAGAAGGCACCCAGAAAACCTTCTGCCCCTGGGAGGGGCTTACGCATAGGA  
TCTCAAAGCCCACTGCCATAGTGATCCACTTCTCAAAGAAGGCCACAACCTCCTAATAGTGCCACTT  
GCCATGGGCCAAGCATATTCAAACCTCCATACCTTTGAAGATCACTGTGACCTGTAAAGGCTCTATC  
ACATTGGTTACAGTCATAGTATGTGTTCTTTTATGTCTTTGGAGATGACTGTGTCGTGAATAGGCTTT  
ATCACATCCATTACATTTGTAGGGTTTCTCTCCAGTGTGAATTATTTTCATGACTTTGAAGTTGGCCAT  
GAGAGGCAAGGGATTTACTACATTGCTTACATTCATAAGGCTTCTCTCCAGTATGTGTTGCTTTATGT

ATTTGGAGACTAGTGTTACTCACAAAGGCTTTACCACATTCATTACATATGTAAGGTTTCTCACCAGT  
ATGAATTTTTTCATATCTTTTAAGAACATTCTGACCTGCAAAGGCTTTACCACATTGATTGCATTCAT  
ACGGTTTTCTCTCCAGTATGTGTTCTTTTATGCCTTTGAGGATAAGTGTGACATGCAAAGGCTTTACCA  
CATTGAGTGTTGAATACAGAGGGTTTCTCTCCAGTATGACTTCTTTCATGCCTTCTATGTCTTCTAGA  
ACTTTGACAATGTTCTTCAATGTTATGGTATTCCCAATTGTAGCCTATAGCAGTGAGGTTCTTGTAGG  
TCTCCAGCATCACATCTTTGTAGAGACGCTTCTGTGAAGGATCCAGCAAAGCCCATTCTTCTCGAGT  
CAAGTTTACATGCACATCATCATAGGTCCTGCATCCATATCACAACCTTCGGAGCTTGCCTGAGCGC  
GCTTCACAGCATCAGCCGCCAGACAGGGAGCACGTCACACAGGACCACCCCATGTA CTCTGCGTTG  
ATACCACTGCTT

>5R\_27downclon9

AGTGGTATCAACGCAGAGTACATGGGATATTTTACAAAAATAATAATTA AAAAGATCCTCCCTCACCA  
TAAAGTGAGAGGGATACTGGTCCTTGTATAGCTGCAACTCAGTAACAGCAATGTTTCATCTACTTTGG  
TCAGTTTCTTAACCATTTCACTGCATTTATATATGTCTGTCTTAAAAATAAAGTAACATTA AAAATGTC  
TACCAGGGTCTTTTCTAAGGTATTTGTTGAAATCTCAAAGCAAACCTCTTTGAGTGACTTAATGCAAT  
GGAAGCAGCTGATGGCTCTGAAGTGCTGAGAAGAATGCAGAATCCTAGTGAAGCCTGAGTGCTCTG  
CACAGCACTAACTTCCAGGCAGTACTTAATTAGTTTACTTTCCTTTATAAACTTTATAGAATGAAAT  
TTTATGCCTATCTGTTTTGGTTGATTAATCACATGTA CTTTCACAAGAAGTCAGCATTAGATGCTTCC  
TTTGTCTCAAATGTCTTTGTTTTTTGGTTTTTCTTTTTGTTTTGTTTTGTTTTGTTTTGTTTTGT  
TTTGT TTTGTTTTTTAATCACTAAAGCTGAAACCGCTGCACTGGTGGTGACCTGAAACATGCAAGG  
ATTTTTTTCTTCACTAAATGTTTGTGTCATCTTTGGCTGTGGAGAGATGTTTAAGTTCATGCTGGCAT  
AAGAAAATATGTTTCAGTGCTTCTTTAGATATTTAGATTA AAGTTTCATGTAACAAACATCAGTTTATT  
ACTCCTAGAATGGCAAGCCACTTCAAGACACGATAAGCAGTAGACAACACAACACTTAGCATTTCGC  
TATTGAGTGACTCAGATTCCAGCTCTGAGTCCCAGACCAATGGAGTGCTAGACAGCATCTTAGAGCC  
TTCATCTGTAAA ACTGACTAAATAGTACATACCTTT CAGGATTACTGCAAACCTTGGGGGTGAAATAT  
GAAAAACTGTGCAGGCCTTCTCACCAAACAGGCACTAAATAAACA AACTAGTTACTATTTCTGTC

ACTGGTGTAGTGTTATTAGAGAGCCTATGCAGGATAGGTGACAATAGTAAGTGTACACTGGTAAA  
CTTATTTTTCACTTCATTAGGAATATTGAGAGATTGAGACTAAGATGACTCTAGCAATTAGCATTTTG  
GGTTGATTTCAATGACACCTTTTCACTTGGTCTTGCTAACTCTGAACATTGCTAATATTCAACCCACC  
TTTTTATCCTTTTAAAAACAAAAAAATATCATATACAACCTGCTCTTTCTTCCTTCCTTTCTTCCTTCG  
TTTCTCTCTCTCTTTCTATCTCTCTGTCTTTCTTTCTTTCTTTCTTTTTAGTTTGTGTGTGGAAGTGTGG  
GGGCACCCTCAGAGACTAGAAGTGTCTGGTCCCATAGAGCTGGAGTTAGAAGCAGTTGTGAACCTT  
CCAATGTGGGTGCTAGAAACCAGGCCTTGGTCCCTCTTCAATGGAAGTCTGTGCTCTTAACCACTGAG  
CCATCTCTTCAGCTCTGTAACCTGCTTCTCATGG

>5R\_5clon2

CAGCTGCTTCCATTGCATTAAGTCACTCAAAGGAGTTTGCTTTGAGATTTCAACAAATACCTTAGAA  
AAGACCTTGGTAGACATTTTAATGTTACTTTATTTTTAAGACAGACATATATAAATGCAGTGAAATG  
GTTAAGAACTGACCAAAGTAGATGAACATTGCTGTTACTGAGTTGCAGCTATACAAGGACCAGTA  
TCCCTCTCACTTTATGGTGAGGGAGGATCTTTTAATTATTATTTTTGTAAAATATATATAATATAAAA  
ACTATCATGTTTATCTTTTTAAGTTGATAGTTGAGTGGCATTAAAGTACATTCACAGTATTGTTGGATT  
AATATTCCCATCTATCACCAGAATTCTTTTACCATTTTAAATTGAAATTCTATGTTTTGGTATGTGCC  
ACAGCTTTTAGTCTGAATTATGTTCCATTTGTATATAGTGTGTATTAATGTATGGTTGCATGCATCTC  
TTGACCAAATATTGACCTTGGGTATTGTTCCCTCAGGTAATACCCACCTTGTTTTTGAAGCCGGGTCTC  
TCAATTGAGATCAGTAATCCCATGTACTCTGCGTTGATAACCACT

>5R\_5clon9

CAGCTGCTTCCATTGCATTAAGTCACTCAAAGGAGTTTGCTTTGAGATTTCAACAAATACCTTAGAA  
AAGACCTTGGTAGACATTTTAATGTTACTTTATTTTTAAGACAGACATATATAAATGCAGTGAAATG  
GTTAAGAACTGACCAAAGTAGATGAACATTGCTGTTACTGAGTTGCAGCTATACAAGGACCAGTA  
TCCCTCTCACTTTATGGTGAGGGAGGATCTTTTAATTATTATTTTTGTAAAATATATATAATATAAAA  
ACTATCATGTTTATCTTTTTAAGTTGATAGTTGAGTGGCATTAAAGTACATTCACAGTATTGTTGGATT  
AATATTCCCATCTATCACCAGAATTCTTTTACCATTTTAAATTGAAATTCTATACAAATTAATACTA  
ACTCTTCACTTCTCCCTCTCATAGCCTTTGGCAACCACCATGCTACTTTCCATTGCTAACAATTTGAT

GTCTCTAGGCTCTTTGTAAAAATAAAATTATATTTGTCTTTTGGCAACTGGGTATTTTCATTTTGTAT  
AAAATCCATCTATGTTTTGGTATGTGCCACAGCTTTTAGTCTGAATTATGTTCCATTTGTATATAGTG  
TGTATTAATGTATGGTTGCATGCATCTCTTGACCAAATATTGACCTTGGGTATTGTTCCCTCAGGTAAT  
ACCCACCTTGTTTTTGAAGCCGGGTCTCTCAATTGAGATCAGTAATCCCATGTACTCTGCGTTGATAC  
CACT

>5R\_5clon10

CAGCTGCTTCCATTGCATTAAGTCACTCAAAGGAGTTTGCTTTGAGATTTCAACAAATACCTTAGAA  
AAGACCTTGGTAGACATTTTAATGTTACTTTATTTTTAAGACAGACATATATAAATGCAGTGAAATG  
GTTAAGAAACTGACCAAAGTAGATGAACATTGCTGTTACTGAGTTGCAGCTATAACAAGGACCAGTA  
TCCCTCTCACTTTATGGTGAGGGAGGATCTTTTAATTATTATTTTTGTAAAATATATATAATATAAAA  
ACTATCATGTTTATCTTTTTAAGTTGATAGTTGAGTGGTATTAAGTACATTCACAGTATTGTTGGATT  
AATATTCCCATCTATCACCAGAATTCTTTTACCATTTTAAATTGAAATTCTATGTTTTGGTATGTGCC  
ACAGCTTTTAGTCTGAATTATGTTCCATTTGTATATAGTGTGTATTAATGTATGGTTGCATGCATCTC  
TTGACCAAATATTGACCTTGGGGGTGAAATATGAAAAACTGTGCAGGCCTTCTCACCAAACAGGCA  
CTAAATAAACAAACACTAGTTACTATTTCTGTCACTGGTGTTAGTGTATTAGAGAGCCTATGCAGG  
ATAGGTGACAATAGTAAGTGTACACTGGTAAACTTATTTTTCACTTCATTAGGAATATTGAGAGATT  
GAGACTAAGATGACTCACCATGTACTCTGCGTTGATACCACTA

>5R\_5clon11

CAGCTGCTTCCATTGCATTAAGTCACTCAAAGGAGTTTGCTTTGAGATTTCAACAAATACCTTAGAA  
AAGACCTTGGTAGACATTTTAATGTTACTTTATTTTTAAGACAGACATATATAAATGCAGTGAAATG  
GTTAAGAAACTGACCAAAGTAGATGAACATTGCTGTTACTGAGTTGCAGCTATAACAAGGACCAGTA  
TCCCTCTCACTTTATGGTGAGGGAGGATCTTTTAATTATTATTTTTGTAAAATATATATAATATAAAA  
ACTATCATGTTTATCTTTTTAAGTTGATAGTTGAGTGGCATTAAAGTACATTCACAGTATTGTTGGATT  
AATATTCCCATCTATCACCAGAATTCTTTTACCATTTTAAATTGAAATTCTATACAAAATTAATACTA  
ACTCTTCACTTCTCCCTCTCATAGCCTTTGGCAACCACCATGCTACTTTCCATTGCTAACAAATTTGAT  
GTCTCTAGGCTCTTTGTAAAAATAAAATTATATTTGTCTTTTGGCAACTGGGTATTTTCATTTTGTAT



AAAATCCATCTATGTTTTGGTATGTGCCACAGCTTTTAGTCTGAATTATGTTCCATTTGTATATAGTG  
TGTATTAATGTATGGTTGCATGCATCTCTTGACCAAATATTGACCTTGGGTATTGTTCCCTCAGGTAAT  
ACCCACCTTGTTTTTGAAGCCGGGTCTCTCAATTGAGATCAGTAATCCCATGTACTCTGCGTTGATAC  
CACT

>5R\_27upclon2

ATGATTACGCCAGCTTGGTACCGAGCTCGGATCCACTAGTAACGGCCGCCAGTGTGCTGGAATTCGC  
CCTTAGTGGTATCAACGCAGAGTACGTGGGAAATAATCCCATTCATAACACTTTAAAAATCCAAGCA  
AAAAATCTCTTGTATTAAACCTGACCAAGAGAGTGAAAGACCTCTATGATGAAAACCTTTAGATACTG  
AAGAAAGAAATTAAGAAGACACTAGAAGAAGGGAAGCCCTTGCAGGCTCATGGGATAACCATAC  
TTCCAAAGTCAATTTATAGATTTAATGCAACCCCAAAGAAATTAAGGGGTTGAGAAATATTGTCAA  
AATACATCATATACATGCATGAAAACACTATAATAAATCCCATATTATGTATAATAAATACTTATT  
AAAACATTTTGAAAACCTTAATATAGATCCAAGTGGTTTTTAGAAACACAATCACACAAATACATAT  
GACAAAACCTCCAAAATAACTGTCAGACATATGATGTTCTGCCAGTAATCCTAGCTCTGGTTAGGTGG  
AGACAGGTGGAGCCCTGAGATTCATTGTCAAACAGCCTAGCCTAAATTACTGATCTCAATTGAGAG  
ACCCGGCTTCAAAAACAAGGTGGGTATTACCTGAGGAACAATACCCAAGGTCAATATTTGGTCAAG  
AGATGCATGCAACCATACATTAATACACACTATATACAAATGGAACATAATTCAGACTAAAAGCTG  
TGGCACATACCAAAACATAGATGGATTTTATACAAAATGAAATAACCCAGTTGCCAAAAGACAAAT  
ATAATTTTATTTTACAAAGAGCCTAGAGACATCAAATTGTTAGCAATGGAAAGTAGCATGGTGGTT  
GCCAAAGGCTATGAGAGGGAGAAGTGAAGAGTTAGTANNAANTTTGTATAGAATTTCAATTTAAAT  
GGTAAAAGAATTCTGGTGATAGATGGGAATATTAATCCAACAATACTGTGAATGTACTTAATGCCAC  
TCAACTATCAACTTAAAAAGATAAACATGATAGTTTTTATATTATATATATTTTACAAAATAATAA  
TTAAAAGATCCTCCCTCACCATAAAGTGAGAGGGATACTGGTCCTTGTATAGCTGCAACTCAGTAAC  
AGCAATGTTTCATCTACTTTGGTCAGTTTCTTAACCATTTCACTGCATTTATATATGTCTGTCTTAAAA  
ATAAAGTAACATTAATAATGTCTACCAAGGTCTTTTCTGAGGTATTTGTTGAAATCTCAAAGCAAAC  
CCTTTGAGTGACTTAATGCAATGGAAGCAGCTGATGGCTCTGAAGTGCTGAGAAGAATGCAGAATC  
CTAGTGAAGCCTGAGTGCTCTGCACAGCACTAACTTCCAGGCAGTACTTAATTAGTTTACTTTTCCTTT

ATAAACTTTATAGAATGAAATTTTATGCCTATCTGTTTTGGTTGATTAATCACATGTACTTTCACAA  
GAAGTCAGCATTAGATGCTTCCTTTGTCCTCAAATGTCTTGTTTTGGGTTTCTTTGNTTGTTGTTGTT  
GTTGTTGTNGTTGNTTTTAATCACTAAGCTGAACCGCTGCACTGGTGGTGACTGAAACATGCAAGGA  
TTTTTTTTCTTCACTAAATGTTTGTGTCATCTTTGGCTGTGGAGAGATGTTTAAGTTCATGCTGGCATA  
AGAAAATATGTTCAAGTCTTCTTTAGATATTTAGACTAAAGTTTCATGTAACAAACATCAGTTTATTA  
CTCCTAGAATGGCAAGCCACTTCAAGACACGATAAGCAGTAGACAACACAACACTTAGCATTGCT  
ATTGAGTGACTCAGATTCCAGCTCTGAGTCCCAGACCAATGGAGTGCTAGACAGCATCTTAGAGCCT  
TCATCTGTAAAAGTACTAAATAGTACATACCTTTCAGGATTACTGCAAACCTGGGGGTGAAATATG  
AAAAACTGTGCAGGCCTTCTCACCAAACAGGCACTAAATAAACAAACACTAGTTACTATTTCTGTCA  
CTGGTGTTAGTGTTATTAGAGAGCCTATGCAGGATAGGTGACAATAGTAAGTGTACACTGGTAAACT  
TATTTTTCACTTCATTAGGAATATTGAGAGATTGAGACTAAGATGACTCTAGCAATTAGCATTTTGG  
GTTGATTTCAATGACACCTTTTCACTTGGTCTTGCTAACTCTGAACATTGCTAATATTCAACCCACCT  
TTTTATCCTTTTAAAAACAAAAAATATCATATACAACCTGCTCTTTCTTCCTTCCTTTCTTCCTTCGTT  
TCTCTCTCTTTCTATCTCTCTGTCTTTCTTTCTTTCTTTCTTTTATGTTTGTGTGTGGAAGTGTGGGGGC  
ACCCTCAGAGACTAGAAGTGTCTGGTCCCATAGAGCTGGAGTTAGAAGCAGTTGTGAACCTTCCAAT  
GTGGGTGCTAGAAACCAGGCCTTGGTCTCTTCAATGGAAGTCTGTGCTCTTAACCACTGAGCCATC  
TCTTCAGCTCTGTAACCTGCTTCTCATGGAAGGGCGAATTCTGCAGATATCCATCACACTGGCGGCCG  
CTCGAGCATGCATCTAGAGGGCCCAATCGCCCTAT

>5R\_27upclon7

AGGGCGATTGGGCCCTCTAGATGCATGCTCGAGCGGCCGCCAGTGTGATGGATATCTGCAGAATTC  
GCCCTTAGTGGTATCAACGCAGAGTACATGGGAAATAATCCCATTACATAACACTTTAAAAATCCAAG  
CAAAAAATCTCTTGTATTAACCTGACCAAGAGAGTGAAAGACCTCTATGATGAAAACCTTTAGATA  
CTGAAGAAAGAAATTAAGAAGACACTAGAAGAAGGGAAGCCCTTGCAGGCTCATGGGATAACCA  
TACTTCCAAAGTCAATTTATAGATTTAATGCAACCCCAAAGAAATTAAGGGGTTGAGAAATATTGT  
CAAAATACATCATATACATGCATGAAAACACTATAATAAATCCCATTATTATGTATAATAAATACTT  
ATTAACCATTTTTGAAAACCTTTAATATAGATCCAAGTGGTTTTTTAGAAACACAATCACACAAATACA

TATGACAAAACCTCCAAAATAACTGTCAGACATATGATGTTCTGCCAGTAATCCTAGCTCTGGTTAGG  
TGGAGACAGGTGGAGCCCTGAGATTCATTGTCAAACAGCCTAGCCTAAATTACTGATCTCAATTGAG  
AGACCCGGCTTCAAAAACAAGGTGGGTATTACCTGAGGAACAATACCCAAGGTCAATATTTGGTCA  
AGAGATGCATGCAACCATACATTAATACACACTATATACAAATGGAACATAATTCAGACTAAAAGC  
TGTGGCACATACCAAAAACATAGATGGATTTTATACAAAATGAAATAACCCAGTTGCCAAAAGACAA  
ATATAATTTTATTTTACAAAAGAGCCTAGAGACATCAAATTGTTAGCAATGGAAAGTAGCATGGTGG  
TTGCCAAAGGCTATGAGAGGGAGAAGTGAAGAGTTAGTATTAATTTTGTATAGAATTTCAATTTAAA  
ATGGTAAAAGAATTCTGGTGATAGATGGGAATATTAATCCAACAATACTGTGAATGTACTTAATGCC  
ACTCAACTATCAACTTAAAAAGATAAACATGATAGTTTTTATATTATATATATTTTACAAAATAAT  
AATTAAGATCCTCCCTCACCATAAAGTGAGAGGGATACTGGTCCTTGTATAGCTGCAACTCAGTA  
ACAGCAATGTTTCATCTACTTTGGTCAGTTTCTTAACCATTTCACTGCATTTATATATGTCTGTCTTAA  
AAATAAGTAACATTAATAATGTCTACCAAGGTCTTTTCTAAGGTATTTGTTGAAATCTCAAAGCAAA  
CTCCTTTGAGTGACTTAATGCAATGGAAGCAGCTGATGGCTCTGAAGTGCTGAGAAGAATGCAGAA  
TCCTAGTGAAGCCTGAGTGCTCTGCACAGCACTAACTCCAGGCAGTACTTAATTAGTTTACTTTCCT  
TTATAAACTTTATAGAATGAAATTTTATGCCTATCTGTTTTGGTTGATTAATCACATGTACTTTCACA  
AGAAGTCAGCATTAGATGCTTCCTTTGTCCTCAATGTCTTGTTTTGGNTTCTTTTTGTTTTGTTTTG  
TTTTGTTTTGTTTTGTTTTGTTTTGTTTTGTTTTTAACTACTAAAGCTGAAACCGCTGCACTGGTGG  
TGACCTGAAACATGCAAGGATTTTTTCTTCACTAAATGTTTGTGTCATCTTTGGCTGTGGAGAGATG  
TTAAGTTCATGCTGGCATAAGAAAATATGTTTCAGTGCTTCTTTAGATATTTAGACTAAAGTTTCATG  
TAACAAACATCAGTTTATTACTCCTAGAATGGCAAGCCACTTCAAGACACGATAAGCAGTAGACAA  
CACAACACTTAGCATTGCTATTGAGTGACTCAGATTCCAGCTCTGAGTCCCAGACCAATGGAGTGC  
TAGACAGCATCTTAGAGCCTTCATCTGTAAAACCTGACTAAATAGTACATACCTTTCAGGATTACTGC  
AACTTGGGGGTGAAATATGAAAACTGTGCAGGCCTTCTCACCAAACAGGCACTAAATAAACAAA  
CACTAGTTACTATTTCTGTCACTGGTGTAGTGTATTAGAGAGCCTATGCAGGATAGGTGACAATA  
GTAAGTGTACACTGGTAAACTTATTTTTCACTTCATTAGGAATATTGAGAGATTGAGACTAAGATGA  
CTCTAGCAATTAGCATTTTGGGTTGATTTCAATGACACCTTTTCACTTGGTCTTGCTAACTCTGAACA

TTGCTAATATTCAACCCACCTTTTTATCCTTTTAAAAACAAAAAAATATCATATACAACCTGCTCTTT  
CTTCCTTCCTTTCTTCCTTCGTTTCTCTCTCTCTTTCTATCTCTCTGTCTTTCTTTCTTTCTTTCTTTTA  
GTTTGTGTGTGGAAGTGTGGGGGCACCCTCAGAGACTAGAAGTGTCTGGTCCCATAGAGCTGGAGTT  
AGAAGCAGTTGTGAACCTTCCAATGTGGGTGCTAGAAACCAGGCCTTGGTCCTCTTCAATGGAAGTC  
TGTGCTCTTAACCACTGAGCCATCTCTTCAGCTCTGTAAGTCTTCATGGAAGGGCGAATTCCAGC  
ACACTGGCGGCCGTTACTAGTGGATCCGAGCTCGGTACCAAGCTGGCGTAATCA

>5R\_27upclon8

AGTGGTATCAACGCAGAGTACATGGGATATTTTACAAAAATAATAATTAAGATCCTCCCTCACCA  
TAAAGTGAGAGGGATACTGGTCCTTGTATAGCTGCAACTCAGTAACAGCAATGTCATCTACTTTGG  
TCAGTTTCTTAACCATTTCACTGCATTTATATATGTCTGTCTTAAAAATAAAGTAACATTAAGTGC  
TACCAAGGTCTTTTCTAAGGTATTTGTTGAAATCTCAAAGCAAACCTTTGAGTGACTTAATGCAAT  
GGAAGCAGCTGATGGCTCTGAAGTGCTGAGAAGAATGCAGAATCCTAGTGAAGCCTGGGCGCTCTG  
CACAGCACTAACTTCCAGGCAGTACTTAATTAGTTTACTTTCTTTATAAACTTTATAGAATGAAAT  
TTTATGCCTATCTGTTTTGGTTGATTAATCACATGTACTTTCACAAGAAGTCAGCATTAGATGCTTCC  
TTTGTCTCAAATGTCTTTGTTTTTTGGTTTTTCTTTTTGTTTTGTTTTGTTTTGTTTTGTTTTGT  
TTTGTTTTTGTTTTTAATCACTAAAGCTGAAACCGCTGCACTGGTGGTGACCTGAAACATGCAAGGA  
TTTTTTTCTTCACTAAATGTTTGTGTCATCTTTGGCTGTGGAGAGATGTTTAAGTTCATGCTGGCATA  
AGAAAATATGTTTCAGTGCTTCTTTAGATATTTAGATTAAAGTTTCATGTAACAAACATCAGTTTATTA  
CTCCTAGAATGGCAAGCCACTTCAAGACACGATAAGCAGTAGACAACACAACACTTAGCATTGCT  
ATTGGGTGACTCAGATTCCAGCTCTGAGTCCCAGACCAATGGAGTGCTAGACAGCATCTTANAGCCT  
TCATCTGTAAACTGACTAAATAGTACATAACCTTTCAGGATTACTGCAAACCTTGGGGGTGAAATATG  
AAAAACTGTGCAGGCCTTCTCACCAAACAGGCACTAAATAAAACAAACACTAGTTACTATTTCTGTCA  
CTGGTGTAGTGTTATTAGAGAGCCTATGCAGGATAGGTGACAATAGTAAGTGTACACTGGTAAACT  
TATTTTCACTTCATTAGGAATATTGAGAGATTGAGACTAAGATGACTCTGGCAATTAGCATTTTGG  
GTTGATTTCAATGACACCTTTTCACTTGGTCTTGCTAACTCTGAACATTGCTAATATTCAACCCACCT  
TTTTATCCTTTTAAAAACAAAAAAATATCATATACAACCTGCTCTTTCTTCCTTCCTTTCTTCCTTCGTT

TCTCTCTCTCTTTCTATCTCTCTGTCTTTCTTTCTTTCTTTCTTTTTAGTTTGTGTGTGGAAGTGTGGGG  
GCACCCTCAGAGACTAGAAGTGTCTGGTCCCATAGAGCTGGAGTTAGAAGCAGTTGTGAACCTTCC  
AATGTGGGTGCTAGAAACCAGGCCTTGGTCCTTCTCAATGGAAGTCTGTGCTCTTAACCACTGAGCC  
ATCTCTTCAGCTCTGTAAGTCTTCTCATGG

>5R\_27upclon11

AGTGGTATCAACGCAGAGTACATGGGATATTTTACAAAAATAATAATTA AAAAGATCCTCCCTCACCA  
TAAAGTGAGAGGGATACTGGTCCTTGTATAGCTGCAACTCAGTAACCGCAATGTTTACTTACTTTGG  
TCAGTTTCTTAACCACTTCACTGCATTTATATATGTCTGTCTTAAAAATAAAGTAACATTA AAAATGTC  
TACCAAGGTCTTTTCTAAGGTATTTGTTGAAATCTCAAAGCAAACCTTTGAGTGACTTAATGCAAT  
GGAAGCAGCTGATGGCTCTGAAGTGTGAGAAGAATGCAGAATCCTAGTGAAGCCTGAGTGCTCTG  
CACAGCACTAACTTCCAGGCAGTACTTAATTAGTTTACTTTCTTTATAAACTTTATAGAATGAAAT  
TTTATGCCTATCTGTTTTGGTTGATTAATCACATGTACTTTCACAAGAAGTCAGCATTAGATGCTTCC  
TTTGTCTCAAATGTCTTTGTTTTTGGTTTTTCTTTTTGTTTTGTTTTGTTTTGTTTTGCTTTGTTTTGT  
TTTGTGTTTTGTTTTTTAATCACTAAAGCTGAAACCGCTGCACTGGTGGTGACCTGAAACATGCAAGG  
ATTTTTTCTTCACTAAATGTTTGTGTCATCTTTGGCTGTGGAGAGATGTTTAAAGTTCATGCTGGCAT  
AAGAAAATATGTTTCAAGTCTTTTAGATATTTAGATTAAGTTCATGTAACAAACATCAGTTTATT  
ACTCCTAGAATGGCAAGCCACTTCAAGACACGATAAGCAGTAGACAACACAACACTTAGCATTTCG  
TATTGAGTGACTCAGATTCCAGCTCTGAGTCCCAGACCAATGGAGTGCTAGACAGCATCTTAGAGCC  
TTCATCTGTAAACTGACTAAATAGTACATACTTTTCAAGGATTACTGCAACTTGGGGGGTGAAATATG  
AAAACGTGTCAGCCTTCTCANNACAGGCACTAAATAACAACACTAGTTACTATTTCTGTCACTGGTG  
TTAGTGTTATTAGAGAGCCTATGCAGGATAGGTGACAATAGTAAGTGTACACTGGTAAACTTATTTT  
TCACTTCATTAGGAATATTGAGAGATTGAGACTAAGATGACTCTAGCAATTAGCATTTTGGGTTGAT  
TTCAATGACACCTTTTCACTTGGTCTTGCTAACTCTGAACATTGCTAATATTCAACCCACCTTTTTATC  
CTTTTAAAAACAAAAAAATATCATATACTGCTCTTTCTTCTCCTTTCTTCTTCTCGTTTTCTCTC  
TCTCTTTCTATCTCTCTGTCTTTCTTTCTTTCTTTCTTTTTAGTTTGTGTGTGGAAGTGTGGGGGCACCC  
TCAGAGACTAGAAGTGTCTGGTCCCATAGAGCTGGAGTTAGAAGCAGTTGTGAACCTTCCAATGTG

GGTGCTAGAAACCAGGCCTTGGTCCTCTTCAATGGAAGTCTGTGCTCTTAACCACTGAGCCATCTCT  
TCAGCTCTGTAAGTCTTCTCATGG

>5R\_27upclon12

AGTGGTATCAACGCAGAGTACATGGGATATTTTACAAAAATAATAATTAAGATCCTCCCTCACCA  
TAAAGTGAGAGGGATACTGGTCCTTGTATAGCTGCAACTCAGTAACAGCAATGTTTCATCTACTTTGG  
TCAGTTTCTTAACCATTTCACTGCATTTATATATGTCTGTCTTAAAAATAAAGTAACATTAATAATGTC  
TACCAAGGTCTTTTCTAAGGTATTTGTTGAAATCTCAAAGCAAACCTCTTTGAGTGACTTAATGCAAT  
GGAAGCAGCTGATGGCTCTGAAGTGCTGAGAAGAATGCAGAATCCTAGTGAAGCCTGAGTGCTCTG  
CACAGCACTAACTTCCAGGCAGTACTTAATTAGTTTACTTTCTTTATAAACTTTATAGAATGAAAT  
TTTATGCCTATCTGTTTTGGTTGATTAATCACATGTACTTTCACAAGAAGTCAGCATTAGATGCTTCC  
TTTGTCTCAAATGTCTTTGTTTTTGGTTTTTCTTTTTGTTTTGTTTTGTTTTGTTTTGTTTTGTTTTGT  
TTTGTTTTTGTTTTTTAATCACTAAAGCTGAAACCGCTGCACTGGTGGTGACCTGAAACATGCAAGG  
ATTTTTTTCTTCACTAAATGTTTGTGTCATCTTTGGCTGTGGAGAGATGTTTAAGTTCATGCTGGCAT  
AAGAAAATATGTTTCAGTGCTTCTTTAGATATTTAGATTAAGTTCATGTAACAAACATCAGTTTATT  
ACTCCTAGAATGGCAAGCCACTTCAAGACACGATAAGCAGTAGACAACACAACACTTAGCATTTCGC  
TATTGAGTGACTCAGATTCCAGCTCTGAGTCCCAGACCAATGGAGTGCTAGACAGCATCTTAGAGCC  
TTCATCTGTAAACTGACTAAATAGTACATACCTTTTCAAGGATACTGCAACTNNGGGGTGAAATATGAAA  
ACTGTGCAGGCCTTCTCACCAAACAGGCACTAAATAAACAAACACTAGTTACTATTTCTGTCACTGG  
TGTTAGTGTTATTAGAGAGCCTATGCAGGATAGGTGACAATAGTAAGTGTACACTGGTAAACTTATT  
TTTCACTTCATTAGGAATATTGAGAGATTGAGACTAAGATGACTCTAGCAATTAGCATTTTGGGTTG  
ATTTCAATGACACCTTTTCACTTGGTCTTGCTAACTCTGAACATTGCTAATATTCAACCCACCTTTTT  
ATCCTTTTAAAAACAAAAAAAATATCATATACAACCTGCTCTTTCTTCCTTCTTTCTTCCTTCGTTTCT  
CTCTCTCTTTCTATCTCTCTGTCTTTCTTTCTTTCTTTCTTTTCTTTTCTTTTCTTTTCTTTTCTTTTCT  
CCCTCAGAGACTAGAAGTGTCTGGTCCCATAGAGCTGGAGTTAGAAGCAGTTGTGAACCTTCCAATG  
TGGGTGCTAGAAACCAGGCCTTGGTCCTCTTCAATGGAAGTCTGTGCTCTTAACCACTGAGCCATCT  
CTTCAGCTCTGTAAGTCTTCTCATGG

>5R\_26downPCR

TNGAGACTATTGCTCGATGTANTCATGNACATGCATGAGTCCCCACTTTCCAGCCCCTTATTCTGTAT  
GGTACAGACTTATCAAAAACAATTTGAAAACCTTTACAAATAATCCAAGTGGTTATGGAAAGGAAGAA  
GTCACACTATCTCTGACAAAACCTCCTTCATAACTGCCAAACACTCCACGTTATGCCCNAAATCCTGG  
CTCTGGCTTTTGGANACATGGGGAACCCCGAAATTGGCTGATATACCCTTTTTATAAACCAATGAAA  
AATATACTGAGAACCAAATTCTCGGAAATAATCCCATTTCATAACACTTGAACAATCCCNGCNGANA  
ATCTCTTGATTAACCTGACCCANACAGTGAAAGACCTCTATGATGAAAACCTTGAATACTGAAGA  
AAGAAATTACTGAAGACCCTACCAGAAGGGAAGCCCTTGCNNGCTCATGGGATAACCATACTTCCA  
AAGTCATTTATAGATTTAATGTTACCCCAAAGAAATTANAGGGTTGAGAAATATTGTCAAATACA  
TCATATACATGCATGAAAACACTATAATAAATCCCATTATTATGTATAATAAATACTTATTAACA  
TTTTGAAAACCTTTAATATAGATCCAAGTGGTTTTTAGAAACACAATCACACAAATACATATGACAAA  
ACTCCAAAATAACTGTCAGACATATGATGTTCTGCCAGTAATCCTAGCTCTGGTTAGGTGGAGACAG  
GTGGAGCCCTGAGATTCATTGTCAAACAGCCTAGCCTAAATTACTGATCTCAATTGAGAGACCCGGC  
TTCAAAAACAAGGTGGGTATTACCTGAGGAACAATACCCAAGGTCAATATTTGGTCAAGAGATGCA  
TGCAACCATACATTAATACACACTATATACAAATGGAACATAATTCAGACTAAAAGCTGTGGCACA  
TACCAAAACATAGATGGATTTTATACAAAATGAAATAACCCAGTTGCCAAAAGACAAATATAATTT  
TATTTTTACAAAGAGCCTAGAGACATCAAATTGTTAGCAATGGAAAGTAGCATGGTGGTTGCCAAA  
GGCTATGAGAGGGAGAAGTGAAGAGTTAGTATTAATTTGTATAGAATTTCAATTTAAAATGGTAA  
AGAATTCTGGTGATANATGGGAATATAATCCCACCATACTGTGAATGTACTTAATGCCACTCACTAT  
CACTTAAAAGATAAACATGATAGTTTTTATATTATATATATTTTACAAAATAATAATTAAGAT  
CCTCCCTCACCATAAAGTGAGAGGGATACTGGTCCTTGTATAGCTGCAACTCAGTAACAGCAATGTT  
CATCTACTTTGGTCAGTTTCTTAACCATTTCACTGCATTTATATATGTCTGTCTTAAAATAAAGTAA  
CATTAATGTCTACCAAGGTCTTTTCTAAGGTATTTGTTGAAATCTCAAAGCAAACCTTTGAGTG  
ACTTAATGCAATGGAAGCAGCTGATGGCTCTGAAGTGCTGAGAAGAATGCAGAATCCTAGTGAAGC  
CTGAGTGCTCTGCACAGCACTAACTCCAGGCAGTACTTAATTAGTTTACTTTTCTTTATAAACTTT  
ATAGAATGAAATTTTATGCCTATCTGTTTTGGTTGATTAATCACATGTACTTTCACAAGAAGTCAGCA

TTAGATGCTTCCTTTGTCTCAAATGTCTTTGTTTTTTGGTTTTTCTTTTTGTTTTGTTTTGTTTTGTTTT  
GTTTTGTTTTGTTTTGTTTTGTTTTTTAATCACTAAAGCTGAAACCGCTGCACTGGTGGTGACCTGA  
AACATGCAAGGATTTTTTTCTTCACTAAATGTTTGTGTCATCTTTGGCTGTGGAGAGATGTTTAAGTT  
CATGCTGGCATAAGAAAATATGTTTCAGTGCTTCTTTAGATATTTAGACTAAAGTTTCATGTAACAAA  
CATCAGTTAT

>5R\_26upPCR

TATATTTGGCAGCCTATAGCTGATGTATTAATGCAGAAAACAAGTGTCCCACTTTCTGACTCTTA  
TTCAAGATGGTACTGAAAAATCTTAGCTAGAACAATATAAAGCAAATAAAAAGAAATATAATATGGA  
AAGGAAGAAGTCAAACCTATCTCTATTTGCAGATAATTCAAAGACTCTAAAGACTCCACCAGAAAAC  
CTAAAGAATGGATAAATTCTTTTCAACAAAATGGCAAAACACAAAATGGCAAATATAGCCTTTTT  
ATAAACCAATGAAAAATATACTGAGAAAGAAATTCAGGGAAATAATCCCATTCATAACACTTTAAA  
AATCCAAGCAAAAAATCTCTTGTATTAACCTGACCAAGAGAGTGAAAGACCTCTATGATGAAAAC  
TTAGATACTGAAGAAAGAAATTAAGAAGACACTAGAAGAAGGGAAGCCCTTGCAGGCTCATGG  
GATAACCATACTTCCAAAGTCAATTTATAGATTTAATGCAACCCCAAAGAAATTAAGGGGTTGAG  
AAATATTGTCAAATAACATCATATACATGCATGAAAACACTATAATAAATCCCATTTATTATGTATAA  
TAAATACTTATTAACATTTTTGAAAACTTTAATATAGATCCAAGTGGTTTTTTAGAAACACAATCAC  
ACAAATACATATGACAAAACCTCCAAAATAACTGTCAGACATATGATGTTCTGCCAGTAATCCTAGCT  
CTGGTTAGGTGGAGACAGGTGGAGCCCTGAGATTCATTGTCAAACAGCCTAGCCTAAATTACTGATC  
TCAATTGAGAGACCCGGCTTCAAAAACAAGGTGGGTATTACCTGAGGAACAATACCCAAGGTCAAT  
ATTTGGTCAAGAGATGCATGCANCCATACATTAATACACACTATATACAAATGGAACATAATTCAG  
ACTAAAAGCTGTGGCACATACCAAAACATAGATGGATTTTATACAAAATGAAATAACCCAGTTGCC  
AAAAGACAAATATAATTTTATTTTACAAAGAGCCTAGAGACATCAAATTGTTAGCAATGGAAAGT  
AGCATGGTGGTTGCCAAAGGCTATGAGAGGGAGAAGTGAAGAGTTAGTATTAATTTTGTATAGAAT  
TTCAATTTAAAATGGTAAAAGAATTCTGGTGATAGATGGGAATATTAATCCAACAATACTGTGAATG  
TACTTAATGCCACTCAACTATCAACTTAAAAAGATAAACATGATAGTTTTTATATTATATATATTTTA  
CAAAAATAATAATTAAGATCCTCCCTCACCATAAAGTGAGAGGGATACTGGTCCTTGTATAGCTG



CAACTCAGTAACAGCAATGTTTCATCTACTTTGGTCAGTTTCTTAACCATTTCACTGCATTTATATATG  
TCTGTCTTAAAAATAAAGTAACATTA AAAATGTCTACCAAGGTCTTTTCTAAGGTATTTGTTGAAATCT  
CAAAGCAAACCTCTTTGAGTGACTTAATGCAATGGAAGCAGCTGATGGCTCTGAAGTGCTGAGAAG  
AATGCAGAATCCTAGTGAAGCCTGAGTGCTCTGCACAGCACTAACTTCCAGGCAGTACTTAATTAGT  
TTACTTTCCTTTATAAACTTTATAGAATGAAATTTNTGCCTATCTGTTTNGTTGATAATCACATGTAC  
TTTACAAGAAGTCAGCATAGATGCTTCCTTTGTCCTCAATGTCTTGTTTTTTGGTTTTTTCTTTTTGTT  
TTGTTTTGTTTTGTTTTGTTTTGTTTTGTTTTGTTTTGTTTTGTTTTTAAATCACTAAAGCTGAAACCGCTGCA  
CTGGTGGTGACCTGAAACATGCAAGGATTTTTTTCTTCACTAAATGTTTGTGTCATCTTTGGCTGTGG  
AGAGATGTTTAAGTTCATGCTGGCATAAGAAAATATGTTTCAGTGCTTCTTTAGATATTTAGACTAAA  
GTTTCATGTAACAAACATCAGTT

>5R\_NGSP21clon5

AGTGGTATCAACGCAGAGTACATGGGATTACTGATCTCAATTGAGAGACCCGGCTTCAAAAACAAG  
GTGGGTATTACCTGAGGAACAATACCCAAGGTCAATATTTGGTCAAGAGATGCATGCAACCATAACA  
TTAATACACACTATATACAAATGGAACATAATTCAGACTAAAAGCTGTGGCACATACCAAACATA  
GATGGATTTTATACAAAATGAAATAACCCAGTTGCCAAAAGACAAATATAATTTTATTTTTACAAAG  
AGCCTAGAGACATCAAATTGTTAGCAATGGAAAGTAGCATGGTGGTTGCCAAAGGCTATGAGAGGG

>5R\_NGSP21clon6

AGTGGTATCAACGCAGAGTACATGGGATTACTGATCTCAATTGAGAGACCCGGCTTCAAAAACAAG  
GTGGGTATTACCTGAGGAACAATACCCAAGGTCAATATTTGGTCAAGAGATGCATGCAACCATAACA  
TTAATACACACTATATACAAATGGAACATAATTCAGACTAAAAGCTGTGGCACATACCAAACATA  
GATGGATTTTATACAAAATGAAATAACCCAGTTGCCAAAAGACAAATATAATTTTATTTTTACAAAG  
AGCCTAGAGACATCAAATTGTTAGCAATGGAAAGTAGCATGGTGGTTGCCAAAGGCTATGAGAGGG

>5R\_NGSP26clon4

AGTGGTATCAACGCAGAGTGCATGGGATTACTGATCTCAATTGAGAGACCCGGCTTCAAAAACAAG  
GTGGGTATTACCTGAGGAACAATACCCAAGGTCAATATTTGGTCAAGAGATGCATGCAACCATAACA  
TTAATACACACTATATACAAATGGAACATAATTCAGACTAAAAGCTGTGGCACATACCAAACATA

GATGGATTTTATACAAAATGAAATAACCCAGTTGCCAAAAGACAAATATAATTTTATTTTTACAAAG  
AGCCTAGAGACATCAAATTGTTAGCAATGGAAAGTAGCATGGTGGTTGCCAAAGGCTATGAGAGGG  
AGAAGTGAAGAGTTAGTATTAATTTTGTATAGAATTTCAATTTAAAATGGTAAAAGAATTCTGGTGA  
TAGATGGGAATATTAATCCAACAATACTGTGAATGTACTTAATGCCACTCAACTATCAACTTAAAAA  
GATAAACATGATAGTTTTTATATTATATATATTTTTACAAAATAATAATTTAAAAGATCCTCCCTCACC  
ATAAAGTGAGAGGGATACTGGTCCTTGTATAGCTGCAACTCAGTAACAGCAATGTTTCATCTACTTTG  
GTCAGTTTCTTAACCATTTCACTGCATTTATATATGTCTGTCTTAAAAATAAAGTAACATTTAAAATGT  
CTACCAAGGTCTTTTCTAAGGTATTTGTTGAAATCTCAAAGCAAACCTCTTTGAGTGACTTAATGCA  
ATGGAAGCAGCTGATGGCTCTGAAGTGC

>5R\_NGSP26clon2

AGTGGTATCAACGCAGAGTACATGGGATTACTGATCTCAATTGAGAGACCCGGCTTCAAAAACAAG  
GTGGGTATTACCTGAGGAACAATACCCAAGGTCAATATTTGGTCAAGAGATGCATGCAACCATAACA  
TTAATACACACTATATACAAAATGGAACATAATTCAGACTAAAAGCTGTGGCACATACCAAAACATA  
GATGGATTTTATACAAAATGAAATAACCCAGTTGCCAAAAGACAAATATAATTTTATTTTTACAAAG  
AGCCTAGAGACATCAAATTGTTAGCAATGGAAAGTAGCATGGTGGTTGCCAAAGGCTATGAGAGGG  
AGAAGTGAAGAGTTAGTATTAATTTTGTATAGAATTTCAATTTAAAATGGTAAAAGAATTCTGGTGA  
TAGATGGGAATATTAATCCAACAATACTGTGAATGTACTTAATGCCACTCAACTATCAACTTAAAAA  
GATAAACATGATAGTTTTTATATTATATATATTTTTACAAAATAATAATTTAAAAGATCCTCCCTCACC  
ATAAAGTGAGAGGGATACTGGTCCTTGTATAGCTGCAACTCAGTAACAGCAATGTTTCATCTACTTTG  
GTCAGTTTCTTAACCATTTCACTGCATTTATATATGTCTGTCTTAAAAATAAAGTAACATTTAAAATGT  
CTACCAAGGTCTTTTCTAAGGTATTTGTTGAAATCTCAAAGCAAACCTCTTTGAGTGACTTAATGCA  
ATGGAAGCAGCTGATGGCTCTGAAGTGC

>5R\_NGSP26clon1

AGTGGTATCAACGCAGAGTACATGGGAATGGAACATAATTCAGACTAAAAGCTGTGGCACATACCA  
AACATAGATGGATTTTATACAAAATGAAATAACCCAGTTGCCAAAAGACAAATATAATTTTATTTT  
TACAAAGAGCCTAGAGACATCAAATTGTTAGCAATGGAAAGTAGCATGGTGGTTGCCAAAGTCTAT

GAGAGGGAGAAGTGAAGAGTTAGTATTAATTTTGTATAGAATTTCAATTTAAAATGGTAAAAGAAT  
TCTGGTGATAGATGGGAATATTAATCCAACAATACTGTGAATGTACTTAATGCCACTCAACTATCAA  
CTTAAAAAGATAAACATGATAGTTTTTATATTATATATATTTTTACAAAAATAATAATTTAAAAGATCC  
TCCCTCACCATAAAGTGAGAGGGATACTGGTCCTTGTATAGCTGCAACTCAGTAACAGCAATGTTCA  
TCTACTTTGGTCAGTTTCTTAACCATTTCACTGCATTTATATATGTCTGTCTTAAAAATAAAGTAACA  
TTAAAATGTCTACCAAGGTCTTTTCTAAGGTATTTGTTGAAATCTCAAAGCAAACCTTTGAGTGAC  
TTAATGCAATGGAAGCAGCTGATGGCTCTGAAGTGC

>5R-NNGSP28

CTTAGGATATTGAGAGATTGAGACTAAGATGACTCTAGCAATTAGCATTTTGGGTTGATTTCAATGA  
CACCTTTTCACTTGGTCTTGCTAACTCTGAACATTGCTAATATTCAACCCACCTTTTTATCCTTTTAAA  
AACAAAAAAAATATCATATACAACCTGCTCTTTCTTCCTTCCTTTCTTCCTTCGTTTCTCTCTCTCTTC  
TATCTCTCTGTCTTTCTTTCTTTCTTTCTTTTATGTTTGTGTGTGGAAGTGTGGGGGCACCCTCAGAGA  
CTAGAAGTGTCTGGTCCCATAGAGCTGGAGTTAGAAGCAGTTGTGAACCTTCCAATGTGGGTGCTAG  
AAACCAGGCCTTGGTCCTCTTCAATGGAAGTCTGTGCTCTTAACCACTGAGCCATCTCTTCAGCTCTG  
TAACTGCTTCTCATGGTGAAGAAAGGAATACCTGTCTTAAAATTGTATCATGTTACCTGGTAAGGAC  
TATCATAGACAACAGATGCTGTAAAAAANANNGGTTGNGNTTTACCANTTAAAANCTAAA  
AAACNTGACANTNCANCGGGGGTCCCTCTAACTGTCCCCACCCTTTTGCNTTTTTCATCAAATGTAN  
TAATGTACCCNCCCTCNGGGGGGATGTTCTCAAAGATTGNACACAATATTGNCCNCCAANTTTGCA  
AANNAATACNTGTTGTCCCAAACCTATTGTACTTTCTTNAAGCCNGCNACGGTCCCNAAATGATTGT  
TACNATTTTTCNAAATTGTTTTCTGTGCTGNGANAACTTCANGACCAACNCCCAANTTGAGGGTT  
TTATTTNTTCTGNCNNAANTNATAGTCCTTTCANGAAGGAAAATCAGGGCNNTAACCCNGGCAG  
NAGGAAATTATAGCAAAGNCCATGGANGAATGCTNNTGNTTGCTTGNCCCCATAGTTGGCTCAGTT  
GGGTTTTTTTTTTTTTTTTTTCATATGACTAAGGAATACCTACCCAGGGGTCACATTGCCACAAATCGT  
TGGGCTTTCTTACATCAATAATTAATCAAGAAAATGCCAACATATTGCTACAGACCAGTCTGATGA  
GGCCTTTCTCAGTTAAGAAGTCCTCTTGTTGNGAGTGTCTGGAAAAACCCCATATATGTGTGGCCT  
GAGATGAGAGAAGCCAACAGCAGGCTCATCAGTGCTAAGAGGCCAATCACTTTTTCTCTACTACCTG

GGGATGTGAAACAGGGTTAGGGTTAGCAGAATTGGAGACAATTCTGGGGGTAGTTAAAGATTCAGT  
GGGCAAGGTGAGAGAAGGGTTAGCCAAGTGGAAGAGAGAGAGAAAAAAGCAGGGTCAGAGCTG  
GTTCAAGTCTTGGTTAACTCCTCCCCCTAGTTAACCACCTTCACATCTGCCCTTGTTAAGTCCCCTA  
AGTGTTNTCCTGCTATTGTGGACTTTTGGACCGTGCATATTGAACAAANTTATAGCCTTCATAAAAG  
AGAGAATAGGATCAGTGCAGNTGATGGTCCTGAGCCAACAATATGAGAGAGACCCTGAGTGCAGG  
ACCTGAAAAAAAAAATGAGTTAGTTACATAAGACTCCTGAGCATATAACAAGAAAAGGGCAGGGAGC  
GGGGGGATGAGGGAGCCTAAGGGGTTTTCCAGTCCCACATCCTCCTTACAGCTTCCCCCTCCTGCCT  
GGAGTCAAGGCTAGGCCAAGTTCATTCTCCACTCACAAGAACATTCTTGAGTAAAAAATACTCAG  
AATGTACCTGACCCTCTGGAAAGTCCCAGGTAGAGTTCAAATACCTGTCATGCTTGCTAGCCAATAG  
GTTTAAAGGTCAATATGCTTAGCCAATAAGTTTGAGCTGTAATCTTGATGATGTAACCTGTGCCCT  
ATAAAGTATAAAAACTGCTTGTAATAGCCATTTGGGGTTCGCTTCTTATTAACCTCGTCTCGATGCTCT  
GGAAAATAAACCTCTGC
